# Supplementary material for: A novel approach to sequence validating protein expression clones with automated decision making
Source: PubMed Central journal article supplement (PMC1914086; doi:10.1186/1471-2105-8-198), 2007-06-13
Supplement: 1471-2105-8-198-S2.pdf [file 1471-2105-8-198-S2.pdf]

## Additional File 2

# A novel approach to sequence validating protein expression clones with automated decision making

Elena Taycher<sup>1</sup>, Andreas Rolfs<sup>1</sup>, Yanhui Hu<sup>1</sup>, Dongmei Zuo<sup>1,2</sup>, Stephanie E. Mohr<sup>2</sup>,  
Janice Williamson<sup>1</sup>, Joshua LaBaer<sup>1,2§</sup>

<sup>1</sup> Harvard Institute of Proteomics, Harvard Medical School, 320 Charles St., Cambridge, MA 02141

<sup>2</sup> DF/HCC DNA Resource Core, Harvard Medical School, 320 Charles St., Cambridge, MA 02141

### Contents

|                                         |    |
|-----------------------------------------|----|
| Decision Tool Summary .....             | 2  |
| Decision Tool Report Details .....      | 4  |
| Low Confidence Finder Report.....       | 6  |
| Detailed Low Quality Finder Report..... | 7  |
| Gap Mapper Report.....                  | 8  |
| Primer Designer Report.....             | 9  |
| Detailed Primer Information .....       | 12 |
| Primer Order.....                       | 13 |

## Decision Tool Summary

**User ID:** Tester  
**Date:** 2-Feb-07  
**Comment:**  
**User spec:** Test\_spec

### Maximum acceptable number of discrepancies (gene region)

| Base Confidence:                     | High | Low | High | Low |
|--------------------------------------|------|-----|------|-----|
| Silent mutation                      | 3    | 4   | 6    | 6   |
| Conservative substitution            | 3    | 10  | 6    | 10  |
| Nonconservative substitution         | 1    | 1   | 4    | 1   |
| Frameshift                           | 0    | 0   | 0    | 0   |
| Inframe deletion                     | 1    | 2   | 1    | 2   |
| Inframe insertion                    | 0    | 0   | 0    | 0   |
| Truncation                           | 0    | 0   | 0    | 0   |
| No translation (e.g., no ATG)        | 0    | 0   | 0    | 0   |
| Post-elongation(e.g., no stop codon) | 0    | 0   | 0    | 0   |

### Maximum acceptable number of discrepancies (linker region):

| Base Confidence       | High | Low | High | Low |
|-----------------------|------|-----|------|-----|
| 5' substitution       | 1    | 5   | 3    | 5   |
| 5' deletion/insertion | 1    | 1   | 1    | 1   |
| 3' substitution       | 1    | 5   | 3    | 5   |
| 3' deletion/insertion | 1    | 1   | 1    | 1   |

### Maximum acceptable number of discrepancies introduced by ambiguous bases

| Base Confidence:         | High | Low | High | Low |
|--------------------------|------|-----|------|-----|
| Start codon substitution | 100  | 100 | 100  | 100 |
| Stop codon substitution  | 100  | 100 | 100  | 100 |
| Substitution cds         | 100  | 100 | 100  | 100 |
| Frameshift Insertion     | 100  | 100 | 100  | 100 |
| Inframe Insertion        | 100  | 100 | 100  | 100 |
| Substitution 5'          | 100  | 100 | 100  | 100 |
| Insertion 5' linker      | 100  | 100 | 100  | 100 |
| Substitution 3'          | 100  | 100 | 100  | 100 |
| Insertion 3' linker      | 100  | 100 | 100  | 100 |

### Submitted Items:

HSG001710

**Total clone number: 85**

### Report Summary:

|                                                  |    |
|--------------------------------------------------|----|
| Accepted                                         | 62 |
| Rejected                                         | 13 |
| No trace files: Need further analysis            | 0  |
| Assembly not attempted: Need further analysis    | 0  |
| Clone data not analyzed: Need further analysis   | 0  |
| No full sequence coverage: Need further analysis | 7  |
| Persistent LQ Discrepancy: Need further analysis | 0  |
| Other: Need further analysis                     | 0  |

|                                         |   |
|-----------------------------------------|---|
| No match                                | 1 |
| Manul Review High Quality Discrepancies | 0 |
| Not clone sample                        | 2 |

| Decision Tool Report Details |                                                  |                                                                         |                    |             |                          |          |                 |                |             |           |                   |                                          |                                                                                                                               |                               |                                |                               |                              |                               |                              |                          |                          |                           |                               |                                           |   |
|------------------------------|--------------------------------------------------|-------------------------------------------------------------------------|--------------------|-------------|--------------------------|----------|-----------------|----------------|-------------|-----------|-------------------|------------------------------------------|-------------------------------------------------------------------------------------------------------------------------------|-------------------------------|--------------------------------|-------------------------------|------------------------------|-------------------------------|------------------------------|--------------------------|--------------------------|---------------------------|-------------------------------|-------------------------------------------|---|
| Clone Id                     | Group                                            | Next step                                                               | Clone Final Status | Plate Label | Sample Type              | Position | Ref Sequence ID | Ref CDS Length | Gene Symbol | GI Number | Clone Sequence Id | Assembly attempt status - clone sequence | Analysis Status - clone sequence                                                                                              | 5' High Quality Discrepancies | CDS High Quality Discrepancies | 3' High Quality Discrepancies | 5' Low Quality Discrepancies | CDS Low Quality Discrepancies | 3' Low Quality Discrepancies | Forward End Reads Upload | Reverse End Reads Upload | Number of Internal Traces | Number of Gaps                | Total Number of Low Quality Discrepancies |   |
| 0                            | Not clone sample                                 | None                                                                    | In process         | HSG001710   | CONTROL POSITIVE ISOLATE | 1        | N/A             | N/A            | N/A         | N/A       | N/A               | N/A                                      | N/A                                                                                                                           | N/A                           | N/A                            | N/A                           | N/A                          | N/A                           | N/A                          | N/A                      | N/A                      | N/A                       | N/A                           | N/A                                       |   |
| 141618                       | Accepted                                         | Clone finished                                                          | Accepted           | HSG001710   | ISOLATE                  | 2        | 31755           | 2492           |             | 15079680  | 112535            | Assembled                                | Analyzed, no discrepancies found                                                                                              |                               |                                |                               |                              |                               |                              | Uploaded                 | Uploaded                 |                           | 7                             | N/A                                       | 0 |
| 141619                       | Accepted                                         | Clone finished                                                          | Accepted           | HSG001710   | ISOLATE                  | 3        | 31755           | 2492           |             | 15079680  | 112536            | Assembled                                | Analyzed, no discrepancies found                                                                                              |                               |                                |                               |                              |                               |                              | Uploaded                 | Uploaded                 |                           | 7                             | N/A                                       | 0 |
| 141620                       | Rejected                                         | Clone rejected                                                          | Rejected           | HSG001710   | ISOLATE                  | 4        | 31755           | 2492           |             | 15079680  | 113009            | Assembled                                | Analyzed, discrepancies found<br>Frameshift(High): 1                                                                          |                               |                                |                               |                              |                               |                              | Uploaded                 | Uploaded                 |                           | 8                             | N/A                                       | 0 |
| 141630                       | Accepted                                         | Clone finished                                                          | Accepted           | HSG001710   | ISOLATE                  | 5        | 34502           | 2708           |             | 21040398  | 112533            | Assembled                                | Analyzed, no discrepancies found                                                                                              |                               |                                |                               |                              |                               |                              | Uploaded                 | Uploaded                 |                           | 8                             | N/A                                       | 0 |
| 141631                       | Accepted                                         | Clone finished                                                          | Accepted           | HSG001710   | ISOLATE                  | 6        | 34502           | 2708           |             | 21040398  | 112970            | Assembled                                | Analyzed, no discrepancies found                                                                                              |                               |                                |                               |                              |                               |                              | Uploaded                 | Uploaded                 |                           | 8                             | N/A                                       | 0 |
| 141632                       | Accepted                                         | Clone finished                                                          | In process         | HSG001710   | ISOLATE                  | 7        | 34502           | 2708           |             | 21040398  | 112971            | Assembled                                | Analyzed, discrepancies found<br>Silent Substitution(High): 1                                                                 |                               |                                |                               |                              |                               |                              | Uploaded                 | Uploaded                 |                           | 8                             | N/A                                       | 0 |
| 141642                       | Accepted                                         | Clone finished                                                          | Accepted           | HSG001710   | ISOLATE                  | 8        | 42580           | 1082           | MAPK        | 17389605  | 97457             | Assembled                                | Analyzed, no discrepancies found                                                                                              |                               |                                |                               |                              |                               |                              | Uploaded                 | Uploaded                 |                           | 0                             | N/A                                       | 0 |
| 141643                       | Rejected                                         | Clone rejected                                                          | Rejected           | HSG001710   | ISOLATE                  | 9        | 42580           | 1082           | MAPK        | 17389605  | 97458             | Assembled                                | Analyzed, discrepancies found<br>No translation(High): 1                                                                      |                               |                                |                               |                              |                               |                              | Uploaded                 | Uploaded                 |                           | 0                             | N/A                                       | 0 |
| 141644                       | Accepted                                         | Clone finished                                                          | Accepted           | HSG001710   | ISOLATE                  | 10       | 42580           | 1082           | MAPK        | 17389605  | 97459             | Assembled                                | Analyzed, no discrepancies found                                                                                              |                               |                                |                               |                              |                               |                              | Uploaded                 | Uploaded                 |                           | 0                             | N/A                                       | 0 |
| 141686                       | Accepted                                         | Clone finished                                                          | Accepted           | HSG001710   | ISOLATE                  | 11       | 34121           | 1148           |             | 18490285  | 113008            | Assembled                                | Analyzed, no discrepancies found                                                                                              |                               |                                |                               |                              |                               |                              | Uploaded                 | Uploaded                 |                           | 2                             | N/A                                       | 0 |
| 141687                       | Accepted                                         | Clone finished                                                          | In process         | HSG001710   | ISOLATE                  | 12       | 34121           | 1148           |             | 18490285  | 111035            | Assembled                                | Analyzed, discrepancies found<br>Conservative Substitution(High): 1                                                           |                               |                                |                               |                              |                               |                              | Uploaded                 | Uploaded                 |                           | 1                             | N/A                                       | 0 |
| 141688                       | Accepted                                         | Clone finished                                                          | Accepted           | HSG001710   | ISOLATE                  | 13       | 34121           | 1148           |             | 18490285  | 97463             | Assembled                                | Analyzed, no discrepancies found                                                                                              |                               |                                |                               |                              |                               |                              | Uploaded                 | Uploaded                 |                           | 0                             | N/A                                       | 0 |
| 141704                       | Accepted                                         | Clone finished                                                          | Accepted           | HSG001710   | ISOLATE                  | 14       | 33468           | 1148           |             | 17391431  | 113010            | Assembled                                | Analyzed, no discrepancies found                                                                                              |                               |                                |                               |                              |                               |                              | Uploaded                 | Uploaded                 |                           | 2                             | N/A                                       | 0 |
| 141705                       | Accepted                                         | Clone finished                                                          | Accepted           | HSG001710   | ISOLATE                  | 15       | 33468           | 1148           |             | 17391431  | 112973            | Assembled                                | Analyzed, no discrepancies found                                                                                              |                               |                                |                               |                              |                               |                              | Uploaded                 | Uploaded                 |                           | 1                             | N/A                                       | 0 |
| 141706                       | Accepted                                         | Clone finished                                                          | Accepted           | HSG001710   | ISOLATE                  | 16       | 33468           | 1148           |             | 17391431  | 97466             | Assembled                                | Analyzed, no discrepancies found                                                                                              |                               |                                |                               |                              |                               |                              | Uploaded                 | Uploaded                 |                           | 0                             | N/A                                       | 0 |
| 172223                       | Accepted                                         | Clone finished                                                          | Accepted           | HSG001710   | ISOLATE                  | 17       | 20383           | 1445           | CLK4        | 10190705  | 112978            | Assembled                                | Analyzed, no discrepancies found                                                                                              |                               |                                |                               |                              |                               |                              | Uploaded                 | Uploaded                 |                           | 1                             | N/A                                       | 0 |
| 172224                       | Accepted                                         | Clone finished                                                          | Accepted           | HSG001710   | ISOLATE                  | 18       | 20383           | 1445           | CLK4        | 10190705  | 111040            | Assembled                                | Analyzed, no discrepancies found                                                                                              |                               |                                |                               |                              |                               |                              | Uploaded                 | Uploaded                 |                           | 3                             | N/A                                       | 0 |
| 172226                       | Accepted                                         | Clone finished                                                          | In process         | HSG001710   | ISOLATE                  | 19       | 29343           | 896            | KHK         | 13623266  | 113015            | Assembled                                | Analyzed, discrepancies found<br>Silent Substitution(High): 1                                                                 |                               |                                |                               |                              |                               |                              | Uploaded                 | Uploaded                 |                           | 2                             | N/A                                       | 0 |
| 172227                       | Accepted                                         | Clone finished                                                          | Accepted           | HSG001710   | ISOLATE                  | 20       | 29343           | 896            | KHK         | 13623266  | 113016            | Assembled                                | Analyzed, no discrepancies found                                                                                              |                               |                                |                               |                              |                               |                              | Uploaded                 | Uploaded                 |                           | 2                             | N/A                                       | 0 |
| 172228                       | Accepted                                         | Clone finished                                                          | Accepted           | HSG001710   | ISOLATE                  | 21       | 29343           | 896            | KHK         | 13623266  | 113017            | Assembled                                | Analyzed, no discrepancies found                                                                                              |                               |                                |                               |                              |                               |                              | Uploaded                 | Uploaded                 |                           | 2                             | N/A                                       | 0 |
| 172246                       | Accepted                                         | Clone finished                                                          | Accepted           | HSG001710   | ISOLATE                  | 22       | 29060           | 1505           |             | 13543325  | 112979            | Assembled                                | Analyzed, no discrepancies found                                                                                              |                               |                                |                               |                              |                               |                              | Uploaded                 | Uploaded                 |                           | 3                             | N/A                                       | 0 |
| 172247                       | Accepted                                         | Clone finished                                                          | Accepted           | HSG001710   | ISOLATE                  | 23       | 29060           | 1505           |             | 13543325  | 112980            | Assembled                                | Analyzed, no discrepancies found                                                                                              |                               |                                |                               |                              |                               |                              | Uploaded                 | Uploaded                 |                           | 2                             | N/A                                       | 0 |
| 172248                       | Rejected                                         | Clone rejected                                                          | In process         | HSG001710   | ISOLATE                  | 24       | 29060           | 1505           |             | 13543325  | 112981            | Assembled                                | Analyzed, discrepancies found<br>Nonconservative Substitution(Low): 1                                                         |                               |                                |                               |                              |                               |                              | Uploaded                 | Uploaded                 |                           | 2                             | N/A                                       | 1 |
| 172258                       | Rejected                                         | Clone rejected                                                          | Rejected           | HSG001710   | ISOLATE                  | 25       | 20617           | 941            | PIM1        | 4505810   | 97472             | Assembled                                | Analyzed, discrepancies found<br>Silent Substitution(High): 1<br>Nonconservative Substitution(High): 1<br>Truncation(High): 1 |                               |                                |                               |                              |                               |                              | Uploaded                 | Uploaded                 |                           | 0                             | N/A                                       | 1 |
| 172259                       | No full sequence coverage: Need further analysis | Partial coverage: Forward End read needed Run Gap Mapper Clone finished | In process         | HSG001710   | ISOLATE                  | 26       | 20617           | 941            | PIM1        | 4505810   | 0                 | Assembly failed: more than one contig    | N/A                                                                                                                           |                               |                                |                               |                              |                               |                              | Not uploaded             | Not uploaded             | 1                         | No stretch collection defined | 0                                         |   |
| 172260                       | Accepted                                         | Clone finished                                                          | In process         | HSG001710   | ISOLATE                  | 27       | 20617           | 941            | PIM1        | 4505810   | 113014            | Assembled                                | Analyzed, discrepancies found<br>Silent Substitution(High): 1<br>Nonconservative Substitution(High): 1                        |                               |                                |                               |                              |                               |                              | Uploaded                 | Uploaded                 |                           | 2                             | N/A                                       | 0 |
| 141117                       | Accepted                                         | Clone finished                                                          | Accepted           | HSG001710   | ISOLATE                  | 28       | 40814           | 1394           | CCNA        | 23271352  | 112967            | Assembled                                | Analyzed, no discrepancies found                                                                                              |                               |                                |                               |                              |                               |                              | Uploaded                 | Uploaded                 |                           | 1                             | N/A                                       | 0 |
| 141118                       | Accepted                                         | Clone finished                                                          | Accepted           | HSG001710   | ISOLATE                  | 29       | 40814           | 1394           | CCNA        | 23271352  | 112968            | Assembled                                | Analyzed, no discrepancies found                                                                                              |                               |                                |                               |                              |                               |                              | Uploaded                 | Uploaded                 |                           | 2                             | N/A                                       | 0 |
| 141119                       | Accepted                                         | Clone finished                                                          | Accepted           | HSG001710   | ISOLATE                  | 30       | 40814           | 1394           | CCNA        | 23271352  | 112969            | Assembled                                | Analyzed, no discrepancies found                                                                                              |                               |                                |                               |                              |                               |                              | Uploaded                 | Uploaded                 |                           | 1                             | N/A                                       | 0 |
| 141125                       | Accepted                                         | Clone finished                                                          | Accepted           | HSG001710   | ISOLATE                  | 31       | 33396           | 293            |             | 16359017  | 97947             | Assembled                                | Analyzed, no discrepancies found                                                                                              |                               |                                |                               |                              |                               |                              | Uploaded                 | Uploaded                 |                           | 0                             | N/A                                       | 0 |
| 141126                       | Rejected                                         | Clone rejected                                                          | Rejected           | HSG001710   | ISOLATE                  | 32       | 33396           | 293            |             | 16359017  | 97948             | Assembled                                | Analyzed, discrepancies found<br>Frameshift(High): 1                                                                          |                               |                                |                               |                              |                               |                              | Uploaded                 | Uploaded                 |                           | 0                             | N/A                                       | 0 |
| 141127                       | Accepted                                         | Clone finished                                                          | Accepted           | HSG001710   | ISOLATE                  | 33       | 33396           | 293            |             | 16359017  | 97460             | Assembled                                | Analyzed, no discrepancies found                                                                                              |                               |                                |                               |                              |                               |                              | Uploaded                 | Uploaded                 |                           | 0                             | N/A                                       | 0 |
| 141149                       | Accepted                                         | Clone finished                                                          | Accepted           | HSG001710   | ISOLATE                  | 34       | 34458           | 1427           |             | 21040479  | 111036            | Assembled                                | Analyzed, no discrepancies found                                                                                              |                               |                                |                               |                              |                               |                              | Not uploaded             | Uploaded                 |                           | 7                             | N/A                                       | 0 |
| 141150                       | Accepted                                         | Clone finished                                                          | Accepted           | HSG001710   | ISOLATE                  | 35       | 34458           | 1427           |             | 21040479  | 111037            | Assembled                                | Analyzed, no discrepancies found                                                                                              |                               |                                |                               |                              |                               |                              | Not uploaded             | Uploaded                 |                           | 7                             | N/A                                       | 0 |
| 141151                       | Accepted                                         | Clone finished                                                          | Accepted           | HSG001710   | ISOLATE                  | 36       | 34458           | 1427           |             | 21040479  | 112972            | Assembled                                | Analyzed, no discrepancies found                                                                                              |                               |                                |                               |                              |                               |                              | Not uploaded             | Uploaded                 |                           | 4                             | N/A                                       | 0 |
| 134468                       | Accepted                                         | Clone finished                                                          | Accepted           | HSG001710   | ISOLATE                  | 37       | 41140           | 1859           | ELF         | 34191107  | 112974            | Assembled                                | Analyzed, no discrepancies found                                                                                              |                               |                                |                               |                              |                               |                              | Not uploaded             | Uploaded                 |                           | 7                             | N/A                                       | 0 |

|        |                                                  |                                                                            |            |           |         |    |       |      |        |          |        |                                                           |                                  |                                                   |                                                                                             |              |              |   |                               |     |   |
|--------|--------------------------------------------------|----------------------------------------------------------------------------|------------|-----------|---------|----|-------|------|--------|----------|--------|-----------------------------------------------------------|----------------------------------|---------------------------------------------------|---------------------------------------------------------------------------------------------|--------------|--------------|---|-------------------------------|-----|---|
| 134469 | Accepted                                         | Clone finished                                                             | Accepted   | HSG001710 | ISOLATE | 38 | 41140 | 1859 | ELF    | 34191107 | 111039 | Assembled                                                 | Analyzed, no discrepancies found |                                                   |                                                                                             | Uploaded     | Uploaded     | 4 | N/A                           | 0   |   |
| 134472 | Rejected                                         | Clone rejected                                                             | In process | HSG001710 | ISOLATE | 39 | 41140 | 1859 | ELF    | 34191107 | 112977 | Assembled                                                 | Analyzed, discrepancies found    | Nonconservative Substitution(Low): 1]             |                                                                                             | Uploaded     | Uploaded     | 4 | N/A                           | 1   |   |
| 134475 | No full sequence coverage: Need further analysis | Partial coverage Reverse End read needed Run primers design Clone rejected | In process | HSG001710 | ISOLATE | 40 | 41140 | 1859 | ELF    | 34191107 | 0      | Assembly pass: sequence is not submitted: cds not covered | N/A                              |                                                   |                                                                                             | Uploaded     | Uploaded     | 1 | 0                             | 0   |   |
| 134476 | Rejected                                         | Clone rejected                                                             | In process | HSG001710 | ISOLATE | 41 | 41140 | 1859 | ELF    | 34191107 | 112976 | Assembled                                                 | Analyzed, discrepancies found    | Silent Substitution(High): 1]                     | Frameshift(Low): 1]                                                                         | Uploaded     | Uploaded     | 4 | N/A                           | 1   |   |
| 134479 | Accepted                                         | Clone finished                                                             | Accepted   | HSG001710 | ISOLATE | 42 | 41140 | 1859 | ELF    | 34191107 | 112975 | Assembled                                                 | Analyzed, no discrepancies found |                                                   |                                                                                             | Uploaded     | Uploaded     | 3 | N/A                           | 0   |   |
| 134480 | No full sequence coverage: Need further analysis | Partial coverage Reverse End read needed Run primers design Clone rejected | In process | HSG001710 | ISOLATE | 43 | 41140 | 1859 | ELF    | 34191107 | 0      | Assembly pass: sequence is not submitted: cds not covered | N/A                              |                                                   |                                                                                             | Uploaded     | Uploaded     | 4 | 0                             | 0   |   |
| 140012 | Accepted                                         | Clone finished                                                             | Accepted   | HSG001710 | ISOLATE | 44 | 43947 | 1670 | GPC    | 23398481 | 112960 | Assembled                                                 | Analyzed, no discrepancies found |                                                   |                                                                                             | Uploaded     | Uploaded     | 5 | N/A                           | 0   |   |
| 140013 | Rejected                                         | Clone rejected                                                             | In process | HSG001710 | ISOLATE | 45 | 43947 | 1670 | GPC    | 23398481 | 112961 | Assembled                                                 | Analyzed, discrepancies found    |                                                   | Inframe(Low): 1 Nonconservative Substitution(Low): 2 Frameshift(Low): 3 Truncation(Low): 1] | Uploaded     | Uploaded     | 5 | N/A                           | 7   |   |
| 140014 | Accepted                                         | Clone finished                                                             | Accepted   | HSG001710 | ISOLATE | 46 | 43947 | 1670 | GPC    | 23398481 | 112962 | Assembled                                                 | Analyzed, no discrepancies found |                                                   |                                                                                             | Uploaded     | Uploaded     | 3 | N/A                           | 0   |   |
| 140042 | Rejected                                         | Clone rejected                                                             | Rejected   | HSG001710 | ISOLATE | 47 | 34005 | 1673 |        | 17390084 | 0      | Assembly pass: sequence is not submitted: cds not covered | N/A                              | Silent Substitution(High): 1 Frameshift(High): 1] |                                                                                             | Uploaded     | Uploaded     | 5 | 1                             | 0   |   |
| 140043 | Accepted                                         | Clone finished                                                             | Accepted   | HSG001710 | ISOLATE | 48 | 34005 | 1673 |        | 17390084 | 112964 | Assembled                                                 | Analyzed, no discrepancies found |                                                   |                                                                                             | Uploaded     | Uploaded     | 5 | N/A                           | 0   |   |
| 140044 | Accepted                                         | Clone finished                                                             | Accepted   | HSG001710 | ISOLATE | 49 | 34005 | 1673 |        | 17390084 | 112963 | Assembled                                                 | Analyzed, no discrepancies found |                                                   |                                                                                             | Uploaded     | Uploaded     | 3 | N/A                           | 0   |   |
| 135071 | Accepted                                         | Clone finished                                                             | In process | HSG001710 | ISOLATE | 50 | 32905 | 1610 |        | 15079459 | 112966 | Assembled                                                 | Analyzed, discrepancies found    | Silent Substitution(High): 1]                     |                                                                                             | Uploaded     | Uploaded     | 3 | N/A                           | 0   |   |
| 135142 | No full sequence coverage: Need further analysis | Partial coverage Reverse End read needed Run primers design Clone rejected | In process | HSG001710 | ISOLATE | 51 | 40988 | 1739 | REL    | 20380824 | 0      | Assembly pass: sequence is not submitted: cds not covered | N/A                              |                                                   |                                                                                             | Not uploaded | Uploaded     | 6 | 0                             | 0   |   |
| 135143 | Accepted                                         | Clone finished                                                             | Accepted   | HSG001710 | ISOLATE | 52 | 40988 | 1739 | REL    | 20380824 | 111034 | Assembled                                                 | Analyzed, no discrepancies found |                                                   |                                                                                             | Not uploaded | Uploaded     | 4 | N/A                           | 0   |   |
| 135144 | Rejected                                         | Clone rejected                                                             | In process | HSG001710 | ISOLATE | 53 | 40988 | 1739 | REL    | 20380824 | 112965 | Assembled                                                 | Analyzed, discrepancies found    |                                                   | Frameshift(Low): 2]                                                                         | Uploaded     | Uploaded     | 3 | N/A                           | 2   |   |
| 172691 | Accepted                                         | Clone finished                                                             | Accepted   | HSG001710 | ISOLATE | 54 | 18824 | 1154 | MAPK 8 | 4506094  | 113021 | Assembled                                                 | Analyzed, no discrepancies found |                                                   |                                                                                             | Uploaded     | Uploaded     | 2 | N/A                           | 0   |   |
| 172692 | Accepted                                         | Clone finished                                                             | Accepted   | HSG001710 | ISOLATE | 55 | 18824 | 1154 | MAPK 8 | 4506094  | 97481  | Assembled                                                 | Analyzed, no discrepancies found |                                                   |                                                                                             | Uploaded     | Uploaded     | 0 | N/A                           | 0   |   |
| 172693 | Accepted                                         | Clone finished                                                             | Accepted   | HSG001710 | ISOLATE | 56 | 18824 | 1154 | MAPK 8 | 4506094  | 113022 | Assembled                                                 | Analyzed, no discrepancies found |                                                   |                                                                                             | Uploaded     | Uploaded     | 2 | N/A                           | 0   |   |
| 172767 | Rejected                                         | Clone rejected                                                             | Rejected   | HSG001710 | ISOLATE | 57 | 28808 | 2630 | DDR1   | 14250529 | 0      | Assembly pass: sequence is not submitted: cds not covered | N/A                              | Frameshift(High): 1]                              |                                                                                             | Uploaded     | Uploaded     | 9 | 2                             | 0   |   |
| 172768 | Accepted                                         | Clone finished                                                             | Accepted   | HSG001710 | ISOLATE | 58 | 28808 | 2630 | DDR1   | 14250529 | 111041 | Assembled                                                 | Analyzed, no discrepancies found |                                                   |                                                                                             | Not uploaded | Uploaded     | 7 | N/A                           | 0   |   |
| 172769 | Accepted                                         | Clone finished                                                             | Accepted   | HSG001710 | ISOLATE | 59 | 28808 | 2630 | DDR1   | 14250529 | 113020 | Assembled                                                 | Analyzed, no discrepancies found |                                                   |                                                                                             | Uploaded     | Uploaded     | 1 | N/A                           | 0   |   |
| 172167 | Accepted                                         | Clone finished                                                             | In process | HSG001710 | ISOLATE | 60 | 19092 | 704  | TK2    | 10281329 | 113012 | Assembled                                                 | Analyzed, discrepancies found    | Conservative Substitution(High): 1]               |                                                                                             | Uploaded     | Uploaded     | 0 | 2                             | N/A | 0 |
| 172168 | Accepted                                         | Clone finished                                                             | In process | HSG001710 | ISOLATE | 61 | 19092 | 704  | TK2    | 10281329 | 113013 | Assembled                                                 | Analyzed, discrepancies found    | Conservative Substitution(High): 1]               |                                                                                             | Uploaded     | Uploaded     | 2 | N/A                           | 0   |   |
| 172169 | No full sequence coverage: Need further analysis | Partial coverage Forward End read needed Run Gap Mapper                    | In process | HSG001710 | ISOLATE | 62 | 19092 | 704  | TK2    | 10281329 | 0      | Assembly failed: more than one contig                     | N/A                              |                                                   |                                                                                             | Not uploaded | Not uploaded | 0 | No stretch collection defined | 0   |   |



## Low Confidence Finder Report

| <b>Clone ID</b> | <b>Ref Sequence ID</b> | <b>CDS Length</b> | <b>Region Type</b> | <b>CDS Start</b> | <b>CDS Stop</b> | <b>LQR Start</b> | <b>LQR Stop</b> |
|-----------------|------------------------|-------------------|--------------------|------------------|-----------------|------------------|-----------------|
| 119565          | 42808                  | 1412              | LQR                | 535              | 787             | 584              | 836             |
| 119612          | 42773                  | 1505              | LQR                | 630              | 947             | 679              | 996             |

## Detailed Low Quality Finder Report

| Clone ID | Ref Sequence ID | CDS Length | Clone Sequence ID | Sequence Analysis Status | Discrepancy ID | Discrepancy Type         | Quality | CDS start | Discrepancy Length | Forward Read Needed | Internal Reads Needed | Reverse Read Needed |
|----------|-----------------|------------|-------------------|--------------------------|----------------|--------------------------|---------|-----------|--------------------|---------------------|-----------------------|---------------------|
| 119565   | 42808           | 1412       | 55117             | ADY                      | 125952         | Silent                   | Low     | 687       | 1                  | No                  | Yes                   | No                  |
| 119612   | 42773           | 1505       | 55108             | ADY                      | 125768         | Frameshift:<br>Insertion | Low     | 726       | 0                  | No                  | Yes                   | No                  |
| 119612   | 42773           | 1505       | 55108             | ADY                      | 125770         | Amb.<br>substitution     | Low     | 865       | 1                  | No                  | Yes                   | No                  |



## Gap Mapper Report

| Clone ID | Ref Sequence ID | CDS Length | Region Type | CDS Start | CDS Stop | Sequence ID |
|----------|-----------------|------------|-------------|-----------|----------|-------------|
| 134915   | 42988           | 1319       | Contig      | -49       | 34       | 206907      |
| 134915   | 42988           | 1319       | LQR         | 17        | 34       | 206907      |
| 134915   | 42988           | 1319       | Gap         | 35        | 549      | N/A         |
|          |                 |            |             |           | -        |             |
| 134915   | 42988           | 1319       | Contig      | 550       | 1000     | 206908      |
| 134915   | 42988           | 1319       | LQR         | 550       | 600      | 206908      |

## Primer Designer Report

Clone ID 119721  
Ref Sequence Length 1799  
Ref Sequence ID 40842

| Primer3 Spec ID 23<br>(Forward only) | Name | Position | Sequence                | Tm   | Direction |
|--------------------------------------|------|----------|-------------------------|------|-----------|
|                                      | F1   | 225      | CTGGCTCCGGAATTC         | 58.7 | Forward   |
|                                      | F2   | 490      | ACCAAAGGGAAGAAGCAGTT    | 57.9 | Forward   |
|                                      | F3   | 806      | CTGTGTTGATGCACTACCCC    | 59.0 | Forward   |
|                                      | F4   | 1095     | GTTTCGGTGTCCAGTTCCAATAC | 60.7 | Forward   |
|                                      | F5   | 1387     | AATGAGTACCGCAAGAGGTTT   | 57.9 | Forward   |

| Primer3 Spec ID 36<br>(Both forward and reverse primers, double coverage) | Name | Position | Sequence             | Tm   | Direction |
|---------------------------------------------------------------------------|------|----------|----------------------|------|-----------|
|                                                                           | F1   | 10       | GAGTCTCTTGCTCCGGTTC  | 57.5 | Forward   |
|                                                                           | F2   | 304      | TGTCAATGCCACCTTCATC  | 57.9 | Forward   |
|                                                                           | F3   | 611      | TTCACCCACCAGTTCTTCA  | 57.5 | Forward   |
|                                                                           | F4   | 910      | CTGGCTACGTGAGCACAAC  | 58.0 | Forward   |
|                                                                           | F5   | 1235     | ATGTTGGTGGACTATGGGG  | 58.1 | Forward   |
|                                                                           | R1   | 1477     | ATTCCTCCAACCTCTGCTGC | 58.0 | Reverse   |
|                                                                           | R2   | 1190     | CCCACCTTGAAGGAGTCAG  | 58.2 | Reverse   |
|                                                                           | R3   | 900      | ATACAGCATGAGCCCAGGA  | 59.2 | Reverse   |
|                                                                           | R4   | 590      | AACATGAGGTTGGTGCCTT  | 58.0 | Reverse   |

| Primer3 Spec ID 42<br>(Both forward and reverse primers, single coverage) | Name | Position | Sequence             | Tm   | Direction |
|---------------------------------------------------------------------------|------|----------|----------------------|------|-----------|
|                                                                           | F1   | 10       | AGTCTCTTGCTCCGGTTCTT | 58.1 | Forward   |
|                                                                           | F2   | 225      | CTGGCTCCGGAATTC      | 58.7 | Forward   |
|                                                                           | F3   | 410      | GCTGGGAGTCTTTCTCCAAC | 58.9 | Forward   |
|                                                                           | F4   | 607      | CACTTCAACCACCAGTTCTT | 57.6 | Forward   |
|                                                                           | F5   | 806      | CTGTGTTGATGCACTACCCC | 59.0 | Forward   |
|                                                                           | R5   | 957      | GTGCTCAGCCTTCAGCAG   | 58.3 | Reverse   |

|    |      |                      |      |         |
|----|------|----------------------|------|---------|
| R4 | 1160 | TGCCAGTGGTAGAGATGGTT | 58.2 | Reverse |
| R3 | 1361 | GACTCCCTGATGACATCCAC | 57.8 | Reverse |
| R2 | 1580 | GGAGCCCCAATCTCTATCAT | 58.0 | Reverse |
| R1 | 1764 | ATCATCCTGACTGGCATCC  | 58.4 | Reverse |

Primer3 Spec ID 40  
(Both forward and  
reverse  
primers, single coverage)

| Name | Position | Sequence             | Tm   | Direction |
|------|----------|----------------------|------|-----------|
| F1   | 108      | TACTATCCATGCCAGCACC  | 58.6 | Forward   |
| F2   | 299      | AGTTTGTCAATGCCACCTTC | 57.6 | Forward   |
| F3   | 489      | AACCAAAGGGAAGAAGCAGT | 57.9 | Forward   |
| F4   | 688      | GGCCACATTTATGGAGACAA | 58.4 | Forward   |
| R4   | 1116     | GTATTGGAAGTGGACACCGA | 58.4 | Reverse   |
| R3   | 1290     | AGCAATCTGGCGAGAGAAG  | 58.3 | Reverse   |
| R2   | 1529     | TTTTCAAGAAGCAGTCCAGG | 58.1 | Reverse   |
| R1   | 1723     | GACAGGTCTTGGTGTGAGG  | 58.1 | Reverse   |

Primer3 Spec ID 47  
(Both forward and  
reverse  
primers, single coverage)

| Name | Position | Sequence           | Tm   | Direction |
|------|----------|--------------------|------|-----------|
| F1   | 90       | GCCAGTGAATCCCTGTTG | 57.5 | Forward   |
| F2   | 225      | CTGGCTCCGGAATTCCT  | 58.7 | Forward   |
| F3   | 356      | GCTCCAACCTTATCCCCA | 58.4 | Forward   |
| F4   | 506      | AGTTGCCAGATGCCAG   | 58.2 | Forward   |
| F5   | 687      | CGGCCACATTTATGGAGA | 58.0 | Forward   |
| F6   | 809      | TGTTGATGCACTACCCCC | 57.8 | Forward   |
| R6   | 986      | TGGAAAAGCTGCTCATCG | 58.6 | Reverse   |
| R5   | 1144     | GGTTGAACTCCATGGCAA | 57.9 | Reverse   |
| R4   | 1287     | AATCTGGCGAGAGAAGGC | 58.0 | Reverse   |
| R3   | 1439     | AGCTCCTGGAAGGAGGTG | 57.9 | Reverse   |
| R2   | 1600     | GGAGACCCTTGAGGGAAA | 57.5 | Reverse   |
| R1   | 1740     | ACGGAAGGAAACGTAGGG | 57.6 | Reverse   |

Primer3 Spec ID 62  
(Both forward and  
reverse)

| Name | Position | Sequence           | Tm   | Direction |
|------|----------|--------------------|------|-----------|
| F1   | 124      | CACCAGGGCATCTGTGTC | 58.5 | Forward   |

primers, double coverage)

|    |      |                    |      |         |
|----|------|--------------------|------|---------|
| F2 | 305  | TCAATGCCACCTTCATCC | 57.9 | Forward |
| F3 | 506  | AGTTGCCAGATGCCAG   | 58.2 | Forward |
| F4 | 730  | CGGCTCTTTAAGGATGGG | 58.2 | Forward |
| F5 | 935  | GTGACCTGCTGAAGGCTG | 58.0 | Forward |
| F6 | 1104 | CCAGTTCCAATACCGCAA | 58.0 | Forward |
| F7 | 1318 | GACCACCACATCCTGCAT | 57.7 | Forward |
| F8 | 1509 | CCCTGGACTGCTTCTTGA | 57.3 | Forward |
| R1 | 1600 | GGAGACCCTTGAGGGAAA | 57.5 | Reverse |
| R2 | 1354 | TGATGACATCCACAGCCA | 57.9 | Reverse |
| R3 | 1191 | GCCCACCTTGAAGGAGTC | 58.1 | Reverse |
| R4 | 957  | GTGCTCAGCCTTCAGCAG | 58.3 | Reverse |
| R5 | 777  | TTCTCCATCCAGCACCTG | 58.2 | Reverse |
| R6 | 588  | CATGAGGTTGGTGCCTTG | 58.6 | Reverse |
| R7 | 373  | TGGGGATAAGGTTGGAGC | 58.4 | Reverse |

Primer3 Spec ID 82  
(Reverse only)

| Name | Position | Sequence            | Tm   | Direction |
|------|----------|---------------------|------|-----------|
| R1   | 1397     | CGGTAATCATTGAAGGGCT | 57.8 | Reverse   |
| R2   | 986      | TGGAAAAGCTGCTCATCG  | 58.6 | Reverse   |
| R3   | 590      | AACATGAGGTTGGTGCCTT | 58.0 | Reverse   |

Primer3 Spec ID 84  
(Both forward and reverse primers, single coverage)

| Name | Position | Sequence              | Tm   | Direction |
|------|----------|-----------------------|------|-----------|
| F1   | 10       | GAGTCTCTTGCTCCGGTTCTT | 60.0 | Forward   |
| F2   | 410      | AGCTGGGAGTCTTTCTCCAAC | 59.9 | Forward   |
| F3   | 805      | GCCTGTGTTGATGCACTACC  | 59.2 | Forward   |
| R3   | 991      | CGTCTGGAAAAGCTGCTCAT  | 60.5 | Reverse   |
| R2   | 1362     | GACTCCCTGATGACATCCACA | 61.0 | Reverse   |
| R1   | 1766     | CATCATCCTGACTGGCATCC  | 61.5 | Reverse   |

## Detailed Primer Information

| Oligo Sample ID | Plate Name   | Well ID | Well Index | Clone ID | Primer ID | Primer Sequence       | Tm   | Primer Length |
|-----------------|--------------|---------|------------|----------|-----------|-----------------------|------|---------------|
| 219531          | OPLATE001013 | 2       | B01        | 251474   | 212777    | TTAAGCCTGGCAAATGTCTC  | 58.0 | 20            |
| 219532          | OPLATE001013 | 3       | C01        | 251474   | 212778    | TGGCGATTGCTTTCTTCTTA  | 58.7 | 20            |
| 219533          | OPLATE001013 | 4       | D01        | 251474   | 212779    | CGGAGGCAGATCTGTTCTTA  | 58.0 | 20            |
| 219534          | OPLATE001013 | 5       | E01        | 251474   | 212780    | AGTGACGGATTTAGTGGCAG  | 57.8 | 20            |
| 219535          | OPLATE001013 | 6       | F01        | 251474   | 212781    | ACAGATTCTGCAAGCGTTTC  | 58.1 | 20            |
| 219536          | OPLATE001013 | 7       | G01        | 251474   | 212782    | CGAATGGCCACAGCTTAATA  | 58.8 | 20            |
| 219537          | OPLATE001013 | 8       | H01        | 251474   | 212783    | CAATCAGGCATTGATGAAGA  | 57.2 | 20            |
| 219538          | OPLATE001013 | 9       | A02        | 251474   | 212784    | AAGCAAGTAATTTGCCGATG  | 57.9 | 20            |
| 219539          | OPLATE001013 | 10      | B02        | 251474   | 212785    | GAGGTAATTCGCTCTGGTGA  | 57.9 | 20            |
| 219540          | OPLATE001013 | 11      | C02        | 251474   | 213623    | ACTGTTGTTGATCTTGCGAA  | 56.9 | 20            |
| 219541          | OPLATE001013 | 12      | D02        | 251214   | 212795    | AATTTAAATCACATTGCGGG  | 57.5 | 20            |
| 219542          | OPLATE001013 | 13      | E02        | 251214   | 212796    | TTACTTGCGTTAGGGCATTTC | 57.9 | 20            |
| 219543          | OPLATE001013 | 14      | F02        | 251214   | 212797    | GATTCAAAATGCAACAGCGT  | 58.8 | 20            |
| 219544          | OPLATE001013 | 15      | G02        | 251214   | 212798    | GGGCAATTGGATTAAGGAT   | 57.9 | 20            |
| 219545          | OPLATE001013 | 16      | H02        | 251214   | 212799    | ACAAAGGGCAATAAATTGGT  | 56.2 | 20            |
| 219546          | OPLATE001013 | 17      | A03        | 251214   | 212800    | GGGAGAATCATGCCACAGTA  | 58.5 | 20            |
| 219547          | OPLATE001013 | 18      | B03        | 251214   | 212801    | CCAGGTGCGTTTTATATTAGG | 56.5 | 21            |
| 219548          | OPLATE001013 | 19      | C03        | 251214   | 213632    | GATGATTGAAGAGAATGCC   | 57.1 | 20            |
| 219549          | OPLATE001013 | 20      | D03        | 251216   | 213642    | CACTTCTTCAAACGCTCG    | 57.2 | 19            |
| 219550          | OPLATE001013 | 21      | E03        | 251216   | 213641    | GTCATCACCTGCGATAAACA  | 57.1 | 20            |
| 219551          | OPLATE001013 | 22      | F03        | 251216   | 213640    | AGGTTGTACACCTTCTTCGC  | 56.9 | 20            |
| 219552          | OPLATE001013 | 23      | G03        | 251216   | 213639    | TGCTTAATGAACGGGATTTT  | 57.3 | 20            |
| 219553          | OPLATE001013 | 24      | H03        | 251216   | 213638    | GAGAAGGAAAACGACCTTCA  | 57.0 | 20            |
| 219554          | OPLATE001013 | 25      | A04        | 251216   | 213637    | GCATCGTAAAGGAAGAACGA  | 58.0 | 20            |
| 219555          | OPLATE001013 | 26      | B04        | 251216   | 213636    | AAGAAGTGTGGGGCAGAATA  | 57.3 | 20            |
| 219556          | OPLATE001013 | 27      | C04        | 251216   | 213635    | CAGGTAAATCTTTTCGCACA  | 56.5 | 20            |

**Primer Order**

| Plate Name   | Row | Column | Oligo Sample ID | Primer Sequence       |
|--------------|-----|--------|-----------------|-----------------------|
| OPLATE001013 | A   | 01     | *****           | .                     |
| OPLATE001013 | B   | 01     | 219531          | TTAAGCCTGGCAAATGTCTC  |
| OPLATE001013 | C   | 01     | 219532          | TGGCGATTGCTTTCTTCTTA  |
| OPLATE001013 | D   | 01     | 219533          | CGGAGGCAGATCTGTTCTTA  |
| OPLATE001013 | E   | 01     | 219534          | AGTGACGGATTTAGTGGCAG  |
| OPLATE001013 | F   | 01     | 219535          | ACAGATTCTGCAAGCGTTTC  |
| OPLATE001013 | G   | 01     | 219536          | CGAATGGCCACAGCTTAATA  |
| OPLATE001013 | H   | 01     | 219537          | CAATCAGGCATTGATGAAGA  |
| OPLATE001013 | A   | 02     | 219538          | AAGCAAGTAATTTGCCGATG  |
| OPLATE001013 | B   | 02     | 219539          | GAGGTAATTCGCTCTGGTGA  |
| OPLATE001013 | C   | 02     | 219540          | ACTGTTGTTGATCTTGCGAA  |
| OPLATE001013 | D   | 02     | 219541          | AATTTAAATCACATTGCGGG  |
| OPLATE001013 | E   | 02     | 219542          | TTACTTGCGTTAGGGCATTTC |
| OPLATE001013 | F   | 02     | 219543          | GATTCAAAATGCAACAGCGT  |
| OPLATE001013 | G   | 02     | 219544          | GGGCAATTGGATTAAGGAT   |
| OPLATE001013 | H   | 02     | 219545          | ACAAAGGGCAATAAATTGGT  |
| OPLATE001013 | A   | 03     | 219546          | GGGAGAATCATGCCACAGTA  |
| OPLATE001013 | B   | 03     | 219547          | CCAGGTGCGTTTTATATTAGG |
| OPLATE001013 | C   | 03     | 219548          | GATGATTGAAGAGAATGCC   |
| OPLATE001013 | D   | 03     | 219549          | CACTTCTTCAAACGCTCG    |
| OPLATE001013 | E   | 03     | 219550          | GTCATCACCTGCGATAAACA  |
| OPLATE001013 | F   | 03     | 219551          | AGGTTGTACACCTTCTTCGC  |
| OPLATE001013 | G   | 03     | 219552          | TGCTTAATGAACGGGATTTT  |
| OPLATE001013 | H   | 03     | 219553          | GAGAAGGAAAACGACCTTCA  |
| OPLATE001013 | A   | 04     | 219554          | GCATCGTAAAGGAAGAACGA  |
| OPLATE001013 | B   | 04     | 219555          | AAGAAGTGTGGGGCAGAATA  |
| OPLATE001013 | C   | 04     | 219556          | CAGGTAAATCTTTTCGCACA  |
| OPLATE001013 | D   | 04     | *****           | .                     |
| OPLATE001013 | E   | 04     | *****           | .                     |
| OPLATE001013 | F   | 04     | *****           | .                     |
| OPLATE001013 | G   | 04     | *****           | .                     |
| OPLATE001013 | H   | 04     | *****           | .                     |
