# Supplementary material for: A novel approach to sequence validating protein expression clones with automated decision making
Source: PubMed Central journal article supplement (PMC1914086; doi:10.1186/1471-2105-8-198), 2007-06-13
Supplement: 1471-2105-8-198-S3.pdf [file 1471-2105-8-198-S3.pdf]

**Additional File 3, Table 1. ACE Data Import and Export.**

Data are submitted into ACE organized by the multi-well plates they are in and exported as a collection of individual clones.

| <i>Imported / exported data structures</i> |                                |                                                                                                        |
|--------------------------------------------|--------------------------------|--------------------------------------------------------------------------------------------------------|
| Data structure                             | Data element                   | Element description                                                                                    |
| Reference sequence description             | Sequence text                  | Reference sequence text                                                                                |
|                                            | CDS start                      | Position of CDS start                                                                                  |
|                                            | CDS stop                       | Position of CDS stop                                                                                   |
|                                            | Sequence annotations           | Collection of public available annotations (GI, Accession Number,...)                                  |
| Clone plate description                    | Project name                   | Project name. Project defined as set of plates                                                         |
|                                            | Cloning strategy description   | Description of cloning strategy                                                                        |
|                                            | Plate name                     | Plate name                                                                                             |
|                                            | List of clones                 | Collection of clones sitting on the plate                                                              |
| Clone description                          | Clone ID                       | Unique clone ID                                                                                        |
|                                            | Plate position                 | Well position for the clone                                                                            |
|                                            | Link to reference sequence     | Link to reference sequence information, several isolates can be cloned for the same reference sequence |
| <i>Exported data structures</i>            |                                |                                                                                                        |
| Data structure                             | Data element                   | Element description                                                                                    |
| Clone description*                         | Clone sequence                 | Clone sequence                                                                                         |
|                                            | Clone analysis status          | Clone status (Accepted / Rejected)                                                                     |
| Clone Sequence                             | Sequence text                  | Clone sequence text with confidence score for each base                                                |
|                                            | CDS Start                      | Position of CDS start on sequence                                                                      |
|                                            | CDS stop                       | Position of CDS stop on sequence                                                                       |
|                                            | Collection of discrepancies    | Collection of all discrepancies defined for the clone                                                  |
| Discrepancy                                | Position                       | Position of discrepancy on clone sequence and CDS position                                             |
|                                            | Length                         | Length of discrepancy in bases                                                                         |
|                                            | Discrepancy type (see Table 2) | Discrepancy type                                                                                       |
|                                            | Confidence score               | Confidence score (see Discrepancy Finder for how score is calculated)                                  |

\* New data types are added to the clone description in ACE.
