# Supplementary material for: A novel approach to sequence validating protein expression clones with automated decision making
Source: PubMed Central journal article supplement (PMC1914086; doi:10.1186/1471-2105-8-198), 2007-06-13
Supplement: 1471-2105-8-198-S4.pdf [file 1471-2105-8-198-S4.pdf]

```
<?xml version="1.0" encoding="ISO-8859-1" ?>
<!DOCTYPE web-app (View Source for full doctype...)>
- <!--
XML file with reference sequence descriptions.
-->
- <!--
XML file contains descriptions of reference sequences
of all clones on the plate 'YGS000374-1'
-->
- <sequence-info>
- <refsequence>
<refsequence-id>4476</refsequence-id>
<refsequence-species>2</refsequence-species>
<refsequence-cds-start>1</refsequence-cds-start>
<refsequence-cds-stop>2019</refsequence-cds-stop>
<refsequence-chromosome>14</refsequence-chromosome>
<refsequence-
sequence>ATGAAGCAGGAGCAGTCCCACGAAGGCGACTCATACAGCACGGAATTCA
TAAATCTCTTTGGCAAAGATACCGCAACACACCCTAGCAGCAACAACGGTGCTAATA
ATAATGGCATGGGGAGCACGAACTCGTTGGACCAGTTTGTGGCAACAGCCTCATCGT
CATCTTCTCTGGTGACCAGCAGCGAGAATAGGCGCCCCCTAATAGGTGACGTTACCA
ATAGGGGCAACACTAACCTATATGACCACGCTGTCACGCCAGAAATACTCTTAGAAC
AGTTGGCCTACGTGGATAACTTCATACCATCTCTGGATAACGAGTTCTCTAATGTGGA
TTGGAATGTGAATACCACCCATAATAATGCAAACAATAATGGCGCGGACACTTTTCAG
CAGCATAAATGCAAATCCTTTTGACTTGGATGAACAACACTAGCCATTGAGTTGAGTGC
GTTTGCCGACGATTCTTTCATCTTCCAGACGAGGATAAGCCGAGCAATAACAATAA
CAACAGCAATAATGGTAATGACGACCATAGCAACCACGACGTATTGCATGAGGACCC
TTCTACCAATAATAGACAAAGAAATCCTCACTTCTTGACTCAAAGAAGGAATACTTTC
CTAACTTCCAATACGACCAATCAAAGTCTCGATTTTTCGTCCAAAAACAAAAGAAAT
GGCAATAACGGCGAAACAAACAACCTTTGGCGACAATATGCAAATAACCATCCTTTT
GAGCCAACTTTATGGGAAGCCCTTCTCAGTTTCCCGCTGACGCAACTAATATGACAT
CAATCGACCATGGCGGCTTCAAAATGTTGACATTACATCAACTGAGAACAATACTA
CCGGTGACAATGGAGTGGATGCGCTATCAAATCTACTACATAGGACAACACACACAC
CGAACCGCTCCTCCCCCTAAGCAATGTCACCTTCTGCTCAAATTCCTCTTCAACA
ACGAAAACATTTCGAAAGCAAAGTCGATAGTAACAGCGATAATAACAGCTCCAACA
AAGCCCCAATAATACTGTTCTGACTATTCAATTATACCAACCTCTGTTTTAGTAAC
TCTATTACCGAGGGTCAACGTGCCAACGGCGCATATAACTCGTTGATCAGCGCGGG
ATTTGACAATGATCAAATAGATGCTATAGCCGCAATAATGGCGTATCATCATCAAAA
AAAGATTAGGGAAAATAACAGTAATAATAATAAAAACATCAACACCAATGACAGTCA
AGAGGCACCCATTCTAAAAACATCAACGAACCTTTAAGTGTCTTAATACCACCCTCT
CCGGCTGAAACTCGTGGGCCAACTACCTTATCAACGTGCGCTTCGTTCAATGAGCAC
GGTGTAGTAGCAGAGGCTTCTTTTCTAAGCTCCATTTTGGAACTGGGCATAAAGCAT
CCAAAAAGTAATAATATTCACAATCAACGACAACCTTACGAAACGATCATAAATA
TCAAGAGAGAGTGACGTAACAATGGAAACGATAATGTCCATCATAATAACGCTGTT
ATTAAGTCAAGTACGACGCGTGGAGACGAAATTGCCAAGATACGATCCGAGCCAAT
TTAAATGCAAGTTCTTCTGATCACAAGGAAAATAGTTTAAAAAGATCACACTCCGGA
GATTTGAAAAATAAAAAAGTACCCGTGACCCGCAAGTATTCTGATAATGAAGACGAT
GAATATGACGATGCAGATTTACACGGCTTTGAAAAGAAGCAACTGATCAAGAAAGA
GTTAGGGGACGACGATGAAGATTTATTGATACAGTCGAAAAAATCTCATCAAAAAA
AAAATAAAGGAAAAGGAGTTAGAATCATCGATACATGAACTGACCGAAATTGCAG
CATCCTTACAAAAACGGATACATACGTTAGAAAACGGAAAACAAGCTTTTAAAGAATT
```

**TAGTTCTGAGTAGCGGTGAAACGGAAGGAATAAAAAAAGCTGAAAGCTTAAAGAAG  
CAAATTTTGGAGAAGGTTTCAGAAAGAATAA**

- <refsequence-feature>  
<name\_type>**GENBANK\_ACCESSION**</name\_type>  
<name\_value>**CAA95979**</name\_value>  
</refsequence-feature>
- <refsequence-feature>  
<name\_type>**SGD**</name\_type>  
<name\_value>**YNL103W**</name\_value>  
<description>**member of the leucine zipper family of transcriptional  
activators**</description>  
</refsequence-feature>
- <refsequence-feature>  
<name\_type>**GI**</name\_type>  
<name\_value>**1302018**</name\_value>  
</refsequence-feature>
- <refsequence-feature>  
<name\_type>**GENE\_SYMBOL**</name\_type>  
<name\_value>**met4**</name\_value>  
</refsequence-feature>
- <refsequence-feature>  
<name\_type>**ORF\_TYPE**</name\_type>  
<name\_value>**Verified**</name\_value>  
</refsequence-feature>
- <refsequence-feature>  
<name\_type>**ORF\_STATUS**</name\_type>  
<name\_value>**No change**</name\_value>  
</refsequence-feature>  
</refsequence>
- <refsequence>  
<refsequence-id>**4500**</refsequence-id>  
<refsequence-species>**2**</refsequence-species>  
<refsequence-cds-start>**1**</refsequence-cds-start>  
<refsequence-cds-stop>**2022**</refsequence-cds-stop>  
<refsequence-chromosome>**14**</refsequence-chromosome>  
<refsequence-  
sequence>**ATGTCAACGCACTCAAACGACTACTTTTCTGCTTCTTCCGGAATGGTCTCT  
GAGACATCGTCCGAGGTTTCTTCGATAAACTCTTCACAGCCTGTATCATTCTCTAAGG  
CTTCTATTGCTGCTCCGTTCCATGCTCTGATCTACACAGCACCAAGTCGAACGATGC  
ATCGAGAAAATTGTCTATTAGTAGGACGTTAACTAATCGGCTCAACGACATTA  
GGCTGTCGATGACGACAACCTTGCAGACGGAAGAAAATTCCGCAGACGTTAATAAAAT  
ATTAGAATCTAGATTTGACGTGGCCGATGCCATTAGGCTACAGCACAATGAGTCAGT  
CCAGTCAAAGTTAAACATCCCAGTCACACACACCACGACTGCAGGCGCCTCGTTGTC  
GGCACCATCTTCTCTGCTTTCTCTGCTTCTTCTATTCAAATGATACTACAGAACATA  
AAGCTTCCATGGACTCCAAACTCATGAGGAATAGACTATATCCGGCTTCCACGAAAC  
ACTCCGGTAAGGATCTTGAGGCCCAAGGAATAACCGAATTCGAGCCTGATGAACCGA  
CTGTAAAAAAGTATTCACCAACAAGTCTACCGGGCAGCTGGAAGTGCACCCCGACG  
GTGGTTATGGCTGGGTCGTGACATTCTGTGTGTTCTTGACCATGTTTTCCACGTGGGG  
CTGCAACGCATCCTTCGGTGTGACCTTGCTACTACTTAAACCATGATACTTACCCT  
GGTGCTTCGAAGTACGATTATGCCTTAATTGCTGGCCTAACTGTCTTTCTCGGTCAAC**

TCTTATCCCCCTTGTGATGGCACTGATGAGAATAATTGGTCTGCGGACCACCATGCT  
TTTTGGTGATGCTGTAATGCTTGCCGCATATCTCTTGGCCTCCTTTACTACCAAGTTAT  
GGCAATTGTATGTCACCCAAGGTTTTATGGTCGGTTGTTCAATATCACTGATTTTCGT  
TCCAGCAACAACCGTCTTACCAGGATGGTTCTTGAAAAAAGAGCTGTCGCAATGGG  
TGTCTCATTATTGGGTACCGGTGCTGGTGGTGTGTTTACGGTTTGGCTACAAACAAA  
ATGCTTTCTGACTTTGGAAATACCCGGTGGTGCCTTCGTATCATAGGCATATCGTGTA  
GCATAAGTGTCTAGTTGCTATTGCGCTCTTAAAAGAAAGAAACCCTACACCTGCCAT  
AGGATTGAAATCGCCTCGGGCCATGTTTGAACAGCTCAAAGCAATGTTTTATTAAA  
GGTTATAACTAAGCCATTTGTGGTACTTATTGCATTATGGTTCATGTTTCGATTATTT  
GCCTACAATATGATGGTTTTTACTTTTCTTTCATACGCAATCTCGAAAGGATTATCAT  
CGCACGACGCTTCCACATTGACTGCCATTTTGAACGGCTCGCAATCCATCGGAAGAC  
CTCTGATGGGTTTAGCGGGAGATAAGTTTGGTAGGGCAAACGTAACGATCGTATTAA  
CCACTTTGTTAAACAATATATATGTTTTCGTTCTGGATCCCCGCTCATACGTTTGTTC  
ACTCATCTTTTTTTCAATTCTAGTTGGTCTCATGCGTTGGTGTGCGCCAACGTCATGAAT  
ACCGTTCTGATTGCCGATATGGTTAAACCAGAAGAGTTTTTGGCCGCTTGGGCCTTCG  
TCAACTACTGTGGTGCGCCTTTCTTATTGGTTTGTGAGGTGATTGCCAGGCATTGAC  
GGTGGAGAAAGATAAGAGCAATCCTTACTTACATGCACAAATTTTTTTCGGTTGCTG  
CTTTATTGCCGCACTAATTTTAATTTCTATCCTTCGTGAATATTCTATCAGGATGAAAT  
TAACGGAAAGACAAGCTATGACAAACGAGAAGTTAAAAGAATGGAAGGCAAGCGAA  
TACGATACCGATTCTGCCGATGAAGATTGGGGTAAATTAAGAAGAAAGAAAGACTAAA  
TATGACCTTCTTTAGGTCCGGGCATTAATAAATACTTCCTAAGAATGGTATATCCAA  
TGAAGTCTAG</refsequence-sequence>

- <refsequence-feature>  
 <name\_type>**GENBANK\_ACCESSION**</name\_type>  
 <name\_value>**CAA96006**</name\_value>  
 </refsequence-feature>
- <refsequence-feature>  
 <name\_type>**SGD**</name\_type>  
 <name\_value>**YNL125C**</name\_value>  
 <description>**Putative monocarboxylate permease**</description>  
 </refsequence-feature>
- <refsequence-feature>  
 <name\_type>**GI**</name\_type>  
 <name\_value>**1302058**</name\_value>  
 </refsequence-feature>
- <refsequence-feature>  
 <name\_type>**GENE\_SYMBOL**</name\_type>  
 <name\_value>**ESBP6**</name\_value>  
 </refsequence-feature>
- <refsequence-feature>  
 <name\_type>**ORF\_TYPE**</name\_type>  
 <name\_value>**Verified**</name\_value>  
 </refsequence-feature>
- <refsequence-feature>  
 <name\_type>**ORF\_STATUS**</name\_type>  
 <name\_value>**No change**</name\_value>  
 </refsequence-feature>  
</refsequence>
- <refsequence>  
 <refsequence-id>**4853**</refsequence-id>  
 <refsequence-species>**2**</refsequence-species>

<refsequence-cds-start>1</refsequence-cds-start>  
<refsequence-cds-stop>2031</refsequence-cds-stop>  
<refsequence-chromosome>15</refsequence-chromosome>  
<refsequence-

sequence>ATGCTCAGAAGACACGGATTATTCTGGTTAAAGACATGTCCCCGTCTAAA  
TGTTCTTCTAAATCAATCCATACCGATACCTCATTTGCTTCATAGCCGTGATATTTGCC  
AGCAAAGATGGTATGCAAAGGGAAAAGAAGGAACCAGATTTCCAAGAAAGAGTTA  
AAGCCTCTCAATTTTTCTATTCCGAATTATATTTCTGTGAATAAATTGGCCAATTTGTT  
AAATTGTCGTGTGGAAAGATTAATCAAAGATTTGACAGCATTAGGTTTCGAAAATAT  
TACAACCACGTATATATTATCAAAGAATACGTCTGAATTGATTTTACAAGAATACAAC  
TTTGCCCTCCGAATCTGTCAACGTCTACAAATTTAGATAATGTTTATGATGAGCTAA  
AATCTCCTGTAAACCCAAAATTATTAACCAAAGAGCCCCCGTGGTAACTATAATGG  
GCCATGTTGATCATGGTAAGACCACTATCATAGACTATCTAAGGAAATCTTCTGTTGT  
GGCTCAAGAACATGGTGGAATCACGCAACACATTGGTGCCTTTCAAATAACAGCTCC  
GAAGTCTGGGAAAAGATCACATTTTTAGACACCCCTGGCCATGCTGCCTTTTTGAA  
AATGAGAGAAAGAGGTGCAAATATTACTGATATTATTGTTTTGGTGGTATCTGTAGA  
AGATTCTCTGATGCCCCAGACATTAGAAGCCATAAAACATGCCAAAATTTCAGGAAA  
TGAAATGATAATTGCAATAACGAAAATAGATAGAATTCCACAGCCAAAAGAACGTGA  
AAAAAAAATTGAAAAGTTATAAATGATTTGATTGTTCAAGGAATACCAGTAGAGAA  
AATTGGCGGAGACGTTCAAGTGATCCCGATAAGTGCCAAAACCTGGTGAGAACATGG  
ACTTTTAGAGGAATCAATAGTCTATTAAGTGAAGTAATGGATATAAGAGCTGAAA  
ACTCCCCTAAAACCTATCGCAGAGGGTTGGATTATCGAAAGTCAAGTTAAAAACAGG  
TCGGAAATGTGGCGACCGTCTTGGTTAAGAAGGGCACTTTACAAAAGGGGAAAATTC  
TAATTTGTGGTAATACATTCTGCAAGATCAAAAATTTAATTGATGATAAGGGCATA  
CGATTCTTAAGGCAACACCATCATATGCTACAGAGGTTCTTGGTTGGAAAGATGTAC  
CCCATGTTGGAGATGAGGTCATTCAGGTAAGAGCGAAGCGATCGCTAAAAAGTTCA  
TCAGTAAAAGGCAAGATCTTATCGAAGTTCAAAAAACTCTAGTATCGTTGAAAAAT  
TAAATGAAGAAAGGGCCCTTGCCAAAGAGCAACACCTAAATAAGGAACTGGAACAT  
GAGAATACTGTCCAGGAACACGAACAAAATACTGGTCCTAAACTTATTAATTACATC  
ATCAAATGTGATGTCTCTGGCTCAGCAGAAGCGGTTTCAGAAAGCATTTCCTCTCTAG  
GAAATGACGAAGTGAGATGTAATGTTATCTTCTTCTGTTGGTATACCTACGGAAA  
GTGACTTAAAGATGGCGCAAATAACGGAGAGTACAATTCTATGCTTCAATTTGGGGA  
ATTTGCCGAGTGAGGTGATCAACAATCGTGCTGGCATCAAAATAAAACAGTACAATG  
TTATCTATAAGCTAATTGAAGACGTCACTGAAACACTAACTGAAAATCTAAAGCCCA  
TCTTTGAAAAAAGATCGTTTCAACTGTTGACGTTCTGTGAAACTTTTACTTTAGGTT  
AAAGAAAAAATTATTAGGATTGCAGGTTGCAAAGTAAACAACGGTGTCATCAAAAA  
GAATTCATTGGTGCAGGTAGTTAGAGGTCCTAACGAAGATGTAATTTTTGATGGGAA  
AATCTCTACTTTGAAGCACAATAAAGATGACGTAGCAGAAGTTTCAAAGGGGCATGA  
ATGTGGAATCACTTTTGAAGAGTGGATTTCGAGGGTTTCAAACCAGGTGATAAGATCCT  
AGTTTATGAAAACGTGCGAGTTCCTCGTTACTTGTAAT</refsequence-sequence>

- <refsequence-feature>  
<name\_type>GENBANK\_ACCESSION</name\_type>  
<name\_value>CAA99023</name\_value>  
</refsequence-feature>
- <refsequence-feature>  
<name\_type>SGD</name\_type>  
<name\_value>YOL023W</name\_value>  
<description>mitochondrial initiation factor 2</description>  
</refsequence-feature>
- <refsequence-feature>  
<name\_type>GI</name\_type>  
<name\_value>1419805</name\_value>

```
    </refsequence-feature>
- <refsequence-feature>
  <name_type>GENE_SYMBOL</name_type>
  <name_value>IFM1</name_value>
  </refsequence-feature>
- <refsequence-feature>
  <name_type>ORF_TYPE</name_type>
  <name_value>Verified</name_value>
  </refsequence-feature>
- <refsequence-feature>
  <name_type>ORF_STATUS</name_type>
  <name_value>No change</name_value>
  </refsequence-feature>
</refsequence>
- <refsequence>
  <refsequence-id>4063</refsequence-id>
  <refsequence-species>2</refsequence-species>
  <refsequence-cds-start>1</refsequence-cds-start>
  <refsequence-cds-stop>2055</refsequence-cds-stop>
  <refsequence-chromosome>13</refsequence-chromosome>
</refsequence-
sequence>ATGGACACCAGCAAGAAAGATACTACTAGGTCGCCCTCACATTCCAACAG
TTCTTCTCCTTCATCTTCTTCTCTCTTTCATCTTCTTCCAAAGAGAAAAACGTCCTA
AGAGACTATCCTCCCAGAATGTAAATTACGATTTGAAAAGGAGAAAGATCATCACTT
CTGAAGGTATAGAAAGATCATTCAAGAACGAGCATAGCAATCTTGCAGTTGAAGACA
ATATCCCGGAAGAAGAACCCAAGGAACCTTCTGAAAAGGACTCCAAGGGTAATATCA
TCAAACCTAATGAGCCATCCACCATCTCGGAAGATTCGAAGGTATCTGTCACTGGATT
GCCGTTAAATAAAGGTCCTTCTGAGAAAATCAAGCGAGAGTCTCTTTGGAATTATAG
AAAAAATTTGGGAGGCCAATCGAACAACTCAGAAATGACGCTGGTCCCAGTAAAA
GATTTACTCAGGTGCCGAAAAATTTTCAGGATTTGAACAGAAATGATTTGAAAACGT
TTTTAACTGAGAACATGACTGAAGAGAGCAATATACGGTCAACTATTGGTTGGAATG
GCGATATAATAAACAGAACTCGTGACCGTGAACCTGAAAGCGACCGCGATAATAAAA
AGCTATCAAATATTAGAACCAAATAAATACTTTCAACGAATGCTACCTATGATTCAAA
AAGTAAACTATTTGGCCAAAATTCATCAAGTCAACATCGAATGCGAGTGAAAAAAT
TTTCAGGGACAAGAACAATTCAACCATAGATTTTGAGAATGAAGATTTTTGTTCCGGC
TTGTAATCAGTCAGGTTCTTTTTTATGCTGTGATACATGCCCAAATCCTTTCACTTTC
TTTGCTTAGACCCACCAATTGATCCGAACAACCTGCCTAAAGGTGATTGGCATTGTAA
TGAATGTAAGTTTAAAATCTTCATAAATAACTCAATGGCAACTTTAAAAAAAATTGA
ATCCAACCTTCATTAAGCAAAAATAACAACGTCAAGATTTTTGCTAAATTACTTTTCAAT
ATCGATTCCCACAACCCAAAACAGTTCAGCTACCAAATTATATAAAAGAAACCTTTC
CTGCTGTGAAAACGGGTTTCGAGAGGACAATACTCTGATGAGAATGATAAGATTCCAT
TAACTGATAGACAATTGTTTAACTTCTTATGGCCAAAGCATAACTAAATTGGACTC
TTACAACCCGGATACACATATAGATTCAAATTCAGGTAAGTTTTTAATTTGTTACAAA
TGCAATCAAACCAGACTAGGTTTCATGGTCTCATCCAGAAAATTCAAGATTAATAATG
ACTTGTGATTATTGTCAGACTCCATGGCATTGGATTGTGTACCGAGGGCTTCTTCA
AGA ACTTAGGTTCAA AATGGAAATGTCCTCTACATTCCCCAACTAAAGTTTACAAA
AGATACACCATTGTCAAGAAGATAATAGCGTAAATTATAAGGTGTGGAAAAACAAC
GATTGATAAACAAGAAAAACCACTTTATTATGAACCTTTACAAAAAATAGGCTACC
AAAATAACGGGAACATTCAAATCATACCAACA ACTAGTCATACAGATTATGATTTCA
ATCAAGATTTCAA AATTACACAAATAGATGAAAATTCCATTA AATATGATTTTTTTGA
TAAAATTTACA AATCAA AATGGTTCAA A AAGAAA ACTCTTTC AATTTCAAGAAAG
```

TTTAATAGATAAGTTAGTATCAAATGGATCCCAAATGGCAATAGCGAGGATAATAT  
GGTCAAAGACATAGCCTCTTTAATATATTTCCAAGTTAGCAACAACGACAAGAGTAG  
TAACAATAAATCGGCTTCCAAAAGCAATAACTTAAGAAAATTATGGGATTTGAAAGA  
ACTGACTAACGTAGTCGTGCCGAACGAAGTACTATACAATTCAATGACTTTTCC  
AGCGATGAAATAAAGCATCTGTTATATTTAAAGAAGATTATCGAATCCAAACCAAAG  
GAAGAACTGTTAAAATTTTTAAACATAGAAAATCCCGAAAACCAATCCGAATAG</re

fsequence-sequence>

- <refsequence-feature>

<name\_type>**GI**</name\_type>

<name\_value>**763022**</name\_value>

</refsequence-feature>

- <refsequence-feature>

<name\_type>**SGD**</name\_type>

<name\_value>**YMR075W**</name\_value>

</refsequence-feature>

- <refsequence-feature>

<name\_type>**GENBANK\_ACCESSION**</name\_type>

<name\_value>**CAA88800**</name\_value>

</refsequence-feature>

- <refsequence-feature>

<name\_type>**ORF\_TYPE**</name\_type>

<name\_value>**Uncharacterized**</name\_value>

</refsequence-feature>

- <refsequence-feature>

<name\_type>**ORF\_STATUS**</name\_type>

<name\_value>**No change**</name\_value>

</refsequence-feature>

</refsequence>

- <refsequence>

<refsequence-id>**4839**</refsequence-id>

<refsequence-species>**2**</refsequence-species>

<refsequence-cds-start>**1**</refsequence-cds-start>

<refsequence-cds-stop>**2061**</refsequence-cds-stop>

<refsequence-chromosome>**15**</refsequence-chromosome>

<refsequence-

sequence>**ATGATACGTCCATTATGTTCAAAAATTATTATCAGTTACATATTCGCAATT  
TCTCAGTTTCTACTGGCCGCTAATGCGTGGTCGCCACAGATAGTTATGTTCTGGCA  
CCGTGTCGTGTCCCGATGACATAAATCTGGTAAGAGAGGCTACGTCTATATCTCAGA  
ATGAGAGCGCATGGTTGGAAAAGAGGAATAAAGTCACTAGTGTAGCTTTAAAAGAT  
TTCTTGACTAGGGCTACTGCAAATTTTTAGATAGCTCAGAAGTTTTGTCGAAGCTAT  
TTAATGATGGCAACAGCGAAAACCTGCCGAAAATTGCTGTCGCCGTTTCAGGTGGGG  
GCTATCGGTCCATGCTAACAGGTGCGGGTGTCTAGCAGCAATGGATAACAGAACTG  
AAGGTGCTTATGAGCATGGGCTGGGTGGACTTTTACAAAGCACAAACATATTTATCTG  
GTGCCTCGGGCGGCAACTGGCTAGTTGGTACATTAGCCTTGAACAATTGGACATCCG  
TGCAAGACATTCTTAATAATATGCAGAACGACGATTCTATTTGGGATTTGTCAGATTC  
TATTGTTACCCCGGCGGCATTAATATATTTCAAACAGCCAAAAGGTGGGATCATAT  
CTCTAATGCTGTCGAATCTAAGCAGAACGCCGATTACAATACTTCTTTGGCCGATATT  
TGGGGCAGAGCCTTGGCGTATAATTTTTCCCTTCTCTAAATAGAGGGGGTATAGGC  
CTGACTTGGTCTTCCATTAGGGATTTCCAGTGTTCAAAATGCTGAAATGCCTTTTC  
CAATTTCTGTTGCGGACGGTAGGTATCCTGGAACAAAAGTCATCAATTTGAACGCAA  
CGTTTTTTGAATTAATCCCTTTGAAATGGGATCCTGGGATCCCTCTTTGAACTTTTT**

GCCAACGTTAAGTACCTTGGAACGAATGTCTCCAATGGTGTACCATTGGAAAGGGGA  
AAATGTACCGCAGGCTTTGATAATGCAGGTTTTATCATGGGTACTTCCTCCACCTTAT  
TTAACCAGTTTCTTTTGAGAATAAACTCCACTCACTTACCTAGTTTCATCACAAGATT  
AGCAAGACATTTTCTAAAGGATTTATCTCAAGATTTTAATGATATCGCTGTTTACAGT  
CCTAATCCATTTAAAGACACGAAGTTTTGGATAGTGACTATACGACAAGTATTGTTG  
ATTCAGACAGCCTATTCTTAGTTGACGGCGGTGAAGACGACGAAAATGTTCTGTGT  
TACCGCTTATACAAAAGGAACGTGATGTGGACATTATTTTTGCGGTAGATAATTCTG  
CCGATATGAGATTGGCTTGGCCTGACGGTCTTCTTTAGTCCATACCTATGAGCGTCA  
ATTCGTTAAGCAAGGTCAAGGTATGTCCTTCCCATATGTTCCAGATACGAATACATTC  
GTTAATTTGGGTTTGAACAAGAAACCAACCTTCTTCGGTTGCGATGCTAATAATTTGA  
CCGATCTTCAATATATTCCACCTCTAGTTGTTTATCTGCCAAATGCAGAATACTCTTTC  
AATAGTAATCAGAGCGCGTTCAAGCTATCATATTCCGAATCCCAAAGAAGAAGTATG  
ATTCAAACGGGTTTGAATTGCAACTAGGAACAACCTTCACTGATGATCCTGAATTC  
ATGGGCTGCGTTCGGCTGCGCCATCATTAGACGTAAGCAACAAGCTTTGAATATTACT  
TTGCCTCCGGAATGTGAAACCTGTTTTAAAAATTATTGCTGGAATGGTACCCTGGATA  
CTACCCATTACCAGATGTTGAAAAGGATGTTCACTCCTTTATCAACGTCAATAG  
CTTCAACAGCTCCATAGGACAAGAAGAAAGTCTTACGCCGGATCTTCAGCTTCCCA  
GTCATCGTCTTCATCATCGTCTTCATCTTCGTCTTCGAAATTCCTTCGGCTACTGCAA  
CCCTTGAGAAAAGGCAGCTACTAATTCTGGATCACATTTATCTGGCATAAGTGTA  
AGTTCTCTGCTATGATTATGCTTACTTTATTGATGTTTACCGGAGCAGTATAA</refse  
quence-sequence>

- <refsequence-feature>  
<name\_type>**GENBANK\_ACCESSION**</name\_type>  
<name\_value>**CAA99010**</name\_value>  
<url><http://www3.ncbi.nlm.nih.gov/htbin-post/Entrez/query?db=p&form=6&uid=CAA99010&Dopt=g></url>  
</refsequence-feature>
- <refsequence-feature>  
<name\_type>**SGD**</name\_type>  
<name\_value>**YOL011W**</name\_value>  
<description>**phospholipase B\lysophospholipase**</description>  
<url><http://genome-www.stanford.edu/cgi-bin/dbrun/SacchDB?find+Sequence+%22YOL011W%22></url>  
</refsequence-feature>
- <refsequence-feature>  
<name\_type>**GI**</name\_type>  
<name\_value>**1419781**</name\_value>  
</refsequence-feature>
- <refsequence-feature>  
<name\_type>**GENE\_SYMBOL**</name\_type>  
<name\_value>**PLB3**</name\_value>  
</refsequence-feature>
- <refsequence-feature>  
<name\_type>**ORF\_TYPE**</name\_type>  
<name\_value>**Verified**</name\_value>  
</refsequence-feature>
- <refsequence-feature>  
<name\_type>**ORF\_STATUS**</name\_type>  
<name\_value>**No change**</name\_value>  
</refsequence-feature>  
</refsequence>

- <refsequence>  
<refsequence-id>770</refsequence-id>  
<refsequence-species>2</refsequence-species>  
<refsequence-cds-start>1</refsequence-cds-start>  
<refsequence-cds-stop>2109</refsequence-cds-stop>  
<refsequence-chromosome>15</refsequence-chromosome>  
<refsequence-  
sequence>ATGGGTATCCAAGGTCTTCTTCCTCAGTTAAAGCCCATACAGAATCCAGT  
ATCACTACGTAGGTATGAAGGAGAAGTGTAGCCATTGATGGCTATGCATGGCTACA  
TAGAGCAGCCTGCTCTTGTGCTTATGAACTTGCAATGGGAAAACCAACTGATAAGTA  
CCTGCAGTTTTTCATAAAAAGATTTAGTTTATTGAAAACCTTTAAAGTTGAACCGTAT  
TTGGTCTTCGATGGTGATGCCATTCCAGTTAAAAAGTCTACTGAATCTAAAAGAAGG  
GATAAGAGAAAAGAAAACAAAGCCATAGCTGAAAGACTGTGGGCCTGTGGCGAAAA  
GAAAAATGCTATGGACTATTTTCAAAAATGTGTCGACATAACGCCTGAAATGGCAA  
ATGTATCATATGCTACTGTAAGCTAAACGGTATTCGGTACATAGTGGCTCCGTTTGAG  
GCTGACTCTCAAATGGTATATTTAGAACAGAAAACATTGTGCAAGGAATAATATCC  
GAAGATTCTGACCTCCTCGTCTTCGGATGTCGACGTCTCATTACGAAGCTGAATGATT  
ATGGAGAATGTTTAGAAATATGTCGCGATAATTTTATTAACTGCCTAAAAGTTTCC  
GTTGGGATCCTTAACATAATGAAGAAATCATAACAATGGTTTGTATCCGGTTGTGAC  
TATACAAATGGAATCCCAAGGTTGGCCTGATTACCGCAATGAAATTAGTTAGAAGA  
TTCAATACTATTGAAAGGATAATTCTGAGTATACAGCGGGAGGGAAAACACTGATGATA  
CCAGACACATACATTAATGAATATGAAGCTGCAGTTTTAGCATTTCATTCCAAAGG  
GTATTTTGCCTATTTCGGAAGAAAATAGTGAGCTTGAATGAAATTCCGCTGACTTG  
AAAGATACCGAAAGTAAAAGAAAAGACTCTACGCGTGCATTGTTTTGTCATACAC  
AGAGAACTCAGAAAAGCAAATTGTTCAATTCGACGACGATATAGATCACCCTTG  
CATTTAAAATGCTCAAGGTGACTTGAATCCATATGATTTTACCAACCTCTAGCCA  
ACAGAGAGCACAAATTACAGCTGGCATCCAAGTCAAATATAGAGTTCGGGAAAACATA  
ATACTACTAATTCTGAAGCCAAAGTCAAACCAATAGAATCGTTCTTCCAAAAAATGA  
CAAATTTGGATCATAACCCAAAAGTTGCAAATAACATCCATAGTCTAAGACAAGCGG  
AAGACAACTGACAATGGCAATTAAGCGTAGGAAATTAAGTAATGCCAATGTAGTCC  
AAGAAACGTTGAAGGATACAAGAAGCAAATTTTTAATAAACCTCCATGACTGTTG  
TGGAAAACCTCAAAGAAAAGGCGACAGCATAACAGGATTTTAAAGAGGACACAAAC  
TCACAATCTTTGGAAGAGCCTGTTTCCGAGTCTCAACTATCTACACAAATACCTAGTT  
CTTTTATTACAACCAATTTAGAGGATGACGACAACCTGAGTGAAGAGGTTTCTGAAG  
TTGTCAGTGACATTGAAGAGGACCGAAAGAATTCTGAAGGAAAGACTATCGGTAAC  
GAAATCTATAATACAGATGATGACGGTGTGGCGATACTAGCGAGGATTATAGCGA  
AACTGCGGAATCAAGAGTTCCACGAGCAGCACCACCTCATTTCGCGGTCATCCCA  
GAGGAGTATATCGGGGTGCACAAAAGTTTTACAAAAGTTTAGATATTCATCTTCATT  
CAGCGGAGTTAATGCAAATAGACAACCACTATTTCTCGGCACGTTAATCAAAAAAG  
TAGAGGAATGGTATACGTCAATCAAATAGAGATGATGATTGCGACGATAACGATG  
GTAAAAATCAAATCACGCAAAGGCCATCACTGCGAAAAGCCTTATTGGTGCCAGGT  
CACAGAGAATTGTGATTGACATGAAAAGCGTAGATGAACGAAAATCATTCAATTCAT  
CACCATTTTGCATGAGGAAAGTAAGAAAAGGGACATCGAACTACTAAGTCAAGCC  
AAGCTCGGCCGGCAGTCAGATCTATCTCCTTGCTTTCCCAATTTGTTTATAAAGGTAA  
ATAA</refsequence-sequence>  
- <refsequence-feature>  
<name\_type>SGD</name\_type>  
<name\_value>YOR033C</name\_value>  
<description>exonuclease</description>  
<url>[http://genome-www.stanford.edu/cgi-  
bin/dbrun/SacchDB?find+Sequence+%22YOR033C%22](http://genome-www.stanford.edu/cgi-bin/dbrun/SacchDB?find+Sequence+%22YOR033C%22)</url>  
</refsequence-feature>



```

- <refsequence-feature>
  <name_type>GENE_SYMBOL</name_type>
  <name_value>DHS1</name_value>
  </refsequence-feature>
- <refsequence-feature>
  <name_type>GI</name_type>
  <name_value>1420150</name_value>
  </refsequence-feature>
- <refsequence-feature>
  <name_type>GENBANK_ACCESSION</name_type>
  <name_value>CAA99223</name_value>
  <url>http://www3.ncbi.nlm.nih.gov/htbin-
    post/Entrez/query?db=p&form=6&uid=CAA99223&Dopt=g</url>
  </refsequence-feature>
- <refsequence-feature>
  <name_type>ORF_TYPE</name_type>
  <name_value>Verified</name_value>
  </refsequence-feature>
- <refsequence-feature>
  <name_type>ORF_STATUS</name_type>
  <name_value>No change</name_value>
  </refsequence-feature>
  </refsequence>
- <refsequence>
  <refsequence-id>4893</refsequence-id>
  <refsequence-species>2</refsequence-species>
  <refsequence-cds-start>1</refsequence-cds-start>
  <refsequence-cds-stop>2136</refsequence-cds-stop>
  <refsequence-chromosome>15</refsequence-chromosome>
  <refsequence-
    sequence>ATGAGCCACTTTTTCGCCGATCATGATGCTCCTCTGAGCATGCTTTCTGTT
    AAAACAGAATACTTTCCTCAATTGACTGATAAGGAACAAAAATATGCGCATTTCATG
    TCAAAGGCCTCCCATGCGGGTTCAAGGGTTGTAATGAGACAAGTTTCTCATGAGAGT
    GAGCCAATTTTTGACCTAATCCTTGCCATTCATTCAAAGCTAAACGGCAAGTACCCAG
    AGGACGATATTACGCAGAAGCAGCAAACGGGTTTGTATTTGGAATACGTTTCTCAAT
    TCTTATCTAATTTGGGTAATTTCAAATCGTTTGGTGACACTAAGTTTATTCTCGTTGT
    GAGGTAATAATTCTTCAAACAGCTTTTGGAGCTGGCCAAGATTAATCCGTGTTCTTCTC
    CGTCACTTTATCTCCTGTTGACGTTAACCATGAATTCACATCTCATCATCTTTTTTCC
    ACCATCAATGAGCTAATTGATATTGGTATTTACCATGTGGAAGAGAAGGCGGCTCTC
    TTAGGGTTTCCCTCTCAAGGTTATACTTCAGCCTATTATCTGGGTTTACCTGTGACAC
    CTGAAGATATGGCTCTTTTCAAAGAGCAGTTGTTTGTGCTGAACTTGCCATCTTGCCTGA
    AAACACAAGAATCAACAAAGTTGGTGAACAGTTTCAAATCTGGGTTGCCTCTGA
    GAATGTGAAAAACAGATAACAGAAACCTACCCAGTGGACAGATCACATTATCCAA
    TGCTGTAACCAAAGTAGAATTCATTTTTGGTGATCATTACAGTGAAATGCGTTTAGTA
    GCATCGTATTTAAAGGAAGCTCAAAAATTCGCGGCTAATGATACTCAAAAAGCAATG
    CTTCAGGAATACATCAACCACTTTGTCACTGGCTCTTCTCAAGCACATAAAGAAGCAC
    AAAAATTTGGGTCAAAGATATATCTCCCGTCATTGAAACAAATATCGGTTTTATCGA
    AACATATAGAGAACCCTCGGGCATAATTGGAGAATTTGAATCGTTGGTTGCAATTC
    AAACAAAGAACGTAAGTAAATTTCCAGCTTGGTTAACAACGCAGAAGAATTCAT
    TTCCTTACTACCATGGTCTAAAGATTACGAAAAACCGATTTTCAATCCACCAGATTT
    CCTCTCTAGAAGTATTAACGTTTACTGGATCGGGTATACCAGCGGGCATCAATATTC

```

CAAACATGATGATGTTGGCTTAAAATTGGGTTCAAGAATGTTTCTTTGGGGAATA  
TCTTAAGCGCGGCTGCCAAAAGCTCATCCAAGCATCCGCCAAGTTTTATATCGCAAG  
AAGATCGCCCAATTTTTGAAAAATATCAAAGTGATTCTTTTGAAGTCCAAGTAGGCAT  
CCATGAATTATTAGGACATGGTTCAGGAAAGTTGTTGACAGAATTTACAGACGGCTT  
TAATTTTGATAAGGAAAACCCTCCTTTAGGTTTGGATGGGAAACCGGTGAGCACATA  
CTACAAAGTTGGTGAAACTTGGGGTTCCAAATTTGGACAGTTAGCTGGCCCATTTGA  
AGAATGTCGTGCGGAAGTAATTGCCATGTTTTTGCTTACTAATAAGAAGATTCTTGAT  
ATTTTTGGTTTTCCATGATGTCGAATCTCAAGATAAAGTGATCTACGCTGGATATCTAC  
AAATGGCCCGTGCGGGTCTCCTAGCTTTAGAATACTGGAATCCAAAACTGGTAAGT  
GGGACAACCACACATGCAAGCAAGATTTTCTATCATGAAAACATTTATGAAGCACT  
CTACAGATAAGAATTTCTTAAAGTTGGAGATGAACAGCACGAATGATGATTTTGCCA  
TCAAGTTGGATAAATCTCTCATTAAAACAGCGGGACATGAATGTGTGAAAGACTATT  
TAAAGCATTTGCATGTTTACAAATGTTCAAGCGATGTGGAACAGGGAAGTAAGTACT  
TTATTGATAGATCAACGGTGACACCGGATTTGGCGTCTTTAAGAGACATCGTCTTATC  
TAAGAGATTGCCAAGGAGACAATTCATACAATCGAATTCTTATATTGACGACAATAA  
CAAGGTAACCCTGAAAGAATATGATGAAACCCACAGGGTATGCTCCAATCTTTCCT  
TGATAGAGAATTATGA</refsequence-sequence>

- <refsequence-feature>  
<name\_type>**GENBANK\_ACCESSION**</name\_type>  
<name\_value>**CAA99066**</name\_value>  
</refsequence-feature>
- <refsequence-feature>  
<name\_type>**SGD**</name\_type>  
<name\_value>**YOL057W**</name\_value>  
</refsequence-feature>
- <refsequence-feature>  
<name\_type>**GI**</name\_type>  
<name\_value>**1419869**</name\_value>  
</refsequence-feature>
- <refsequence-feature>  
<name\_type>**ORF\_TYPE**</name\_type>  
<name\_value>**Uncharacterized**</name\_value>  
</refsequence-feature>
- <refsequence-feature>  
<name\_type>**ORF\_STATUS**</name\_type>  
<name\_value>**No change**</name\_value>  
</refsequence-feature>  
</refsequence>
- <refsequence>  
<refsequence-id>**4474**</refsequence-id>  
<refsequence-species>**2**</refsequence-species>  
<refsequence-cds-start>**1**</refsequence-cds-start>  
<refsequence-cds-stop>**2142**</refsequence-cds-stop>  
<refsequence-chromosome>**14**</refsequence-chromosome>  
<refsequence-  
sequence>**ATGGTCACTAACAATGGAGATGGTGAGCACCTTGGGATCCGAAGAAACG  
GAAATTTAAGGCATCCTTCCAATAATATGAAAATTCCCAGAAGGGCTCAATCAACAG  
TTCTCAATTCAAACCCATTTTATAGTAGGAAGTATTCTATGTCTACCTTAACGCCGAG  
GGATATATGTCGAAGCGTTGATTCTAGAGTATTTGTGGATATGTCTTCTCCAATTTT  
CAGACTCTGGAGGATCCCCACAGAGATGAGATTATAAACAGTGTACGGCTTAACACTAC  
TTGAACAGTAGCAAAGAAGTCCGTCTCTCATGGAATGAAGCAATCCCTAGGGTT**

AATCCGACTAAGAATTCTTCAGCAAGTACCATAGCTGCAGCAAATGTTGATAGTGAT  
GACGATGAGACTAACCTGAGTAGCGCTGGAGGCGACATAACGCATGATATTTACAAG  
TTGGTTAAAGCAGAGGATCCTAAACGGCTCAGACGCCCTCGGTCCATGGAAAATGTA  
ACACCTAAAATTGAGCACCATACTAAATTGTCATCAGCAAGTGGTTTAAATGTCCCG  
GTGGCTTCAGAAGGGAATTTATTGTCAACAAAAAAGGCAAGAACATCAATTAATG  
ATTCCGCTAGCTCAGACTTCACTTCGCATGAAAGCGATTTCGATTAACCAGTCATCTCC  
ATCTTCTAACCAAGATATCGATAAAGGTCCCCTTTTTAACAAGAACTTTTTGGAATTT  
CTATACGTGTTTGGACATTTTGTCTGGTGAATCCTTCGAGGATGATTTTATCCCTGATA  
GCTCAAACATGATGATACGCGGAGAAGATGAAAGGAGTGCATTGCTGTCTCGGCCTG  
ACCATATGAAAGTATTACCTTCAGCCAAAGGTACGACTTCGACAAAGAAGGTTTTTTTT  
GATATTGCTTAAATCTTTCATTGGAAGTGGCGTTTTATTTTTACCTAATGCCTTTCATA  
ATGGTGGTTTGTTCAGTAAGTATGCTGGCCTTTTTTGGAAATTTATTCATACTG  
GTGTTACTACATATTGGTGCAGGCCAAATCTTCATGCGGTGTATCCTCCTTGGTGAT  
ATTGGTTTAAAAGTGTATGGACCTTGGATGAGAATAATAATTCTTCTCCCTAGTAA  
TAACTCAAGTTGGATTCTCTGGAGCTTATATGATATTTACTGCAAAAAATTTACAAGC  
TTTTCTTGATAACGTATTCCATGTGGGCGTCTACCTTTATCTTACCTGATGGTCTTTC  
AAACGATCATTTTTATTCCACTTTCGTTTTATTAGAAACATTCGAAATTGTCACTACCA  
TCTTACTAGCAAATTTTTTTCATCATGGCTGGTTTAGTCATTGTCATTATTTTTACAGC  
CAAAGGTTGTTTTTGGACCTGATGGGGACCCAGCAATGGGTGTCGTCTATGGCTT  
AATGCAGACCGTTGGACGCTGTTTATCGGGACGGCAATATTTGCTTTCGAAGGAAT  
CGGGTTAATTATTCTGTTCAAGACTCAATGAGAAATCCTGAAAAATTTCTTTAGTA  
CTTGCTTGGTGATTCTAACGGCAACCATACTTTTCAATTCATAGCTACATTGGGAT  
ATTTGGCATAACGGCTCAAATGTTCAAACGGTTATACTGTTGAACTTACCTCAAAGTAA  
CATTTTTGTAAACTTAATCCAGCTGTTCTATTCCATCGCAATTATGTTGTCCACACCTT  
TGCAGTTGTTTCCAGCTATTAATAATTATTGAAAATAAGTTTTTCCAAAGTTCACTAA  
AATATATGTCAAGCACGATGATCTAACAACAAGAGTCGAATTACGTCCTAATTCAGG  
AAAGCTGAACTGGAAAATTAATGGCTGAAGAACTTTATTGTTCTATAATCGTAAT  
CATTGTTGTATCAATTGCTTACTTTGGGTCTGATAATTTAGACAAGTTCGTTTCAGTT  
ATAGGATCCCTCGCCTGTATTCTTTGGTATATATATACCCATCGATGCTGCATTTAC  
GGGGCAATAGCCTCCAGAGACTAAAGGGGAATTTTGGAGATTCAAACCAATGTTAG  
ATACCATTTAATTTTTCTTCGGTATTGCAAGCATGCTTTATACGTCTTACCAGAGTAT  
ATTCGGTGTCTAG</refsequence-sequence>

- <refsequence-feature>  
 <name\_type>GENBANK\_ACCESSION</name\_type>  
 <name\_value>CAA95977</name\_value>  
 </refsequence-feature>
- <refsequence-feature>  
 <name\_type>SGD</name\_type>  
 <name\_value>YNL101W</name\_value>  
 </refsequence-feature>
- <refsequence-feature>  
 <name\_type>GI</name\_type>  
 <name\_value>1302014</name\_value>  
 </refsequence-feature>
- <refsequence-feature>  
 <name\_type>ORF\_TYPE</name\_type>  
 <name\_value>Verified</name\_value>  
 </refsequence-feature>
- <refsequence-feature>  
 <name\_type>ORF\_STATUS</name\_type>  
 <name\_value>No change</name\_value>

```
</refsequence-feature>
</refsequence>
- <refsequence>
  <refsequence-id>4847</refsequence-id>
  <refsequence-species>2</refsequence-species>
  <refsequence-cds-start>1</refsequence-cds-start>
  <refsequence-cds-stop>2145</refsequence-cds-stop>
  <refsequence-chromosome>15</refsequence-chromosome>
  <refsequence-
sequence>ATGACAGAAATTATTGATTTAGACTTGGTCGATGACTTTATCAAGAAACC
TATGGTCAAACAACAGAAAACCAGTCTTCAAAGCCTAGGGTAAAAAGAAGGGGTC
AGTTGACCTTTGATGATTTTCAGAAACATCAAATTGTAGAAGAACCTGTTGACTTTC
TCACAATAGTTCAATTGACGAATCACTGGATGCTGCTACCCAAAATACTAAAAAGCG
GGAGAAATATGAAGGTACCTGTGATGAAGAAATGAAAATAAAGAAATGGAGGCAA
ATATGGCAAGCAAATATTCTAATATCAAACACATTCGAACGACACTAACAAGGTAG
AGTCGATCAGTGAACACACTACTTCTAATAATAGACCATTGAATACATTAACCTGGTC
ACCAAATATTCCTTTACGATATTCTGACTTTGCAAAGTTTATGAGTGATGAGACGGTA
ACGGAAAGCAATTGGGCGCCTCCCTTTGCACCCCTCTCCCATATGCAGGCGATGTTA
TGAAGATCCTTTCTTTTATCGTCAAATTTAAATGGGTGTTGAGCGACGATCTACTGAA
CCTGTCATTTCAAGATGTGGAGATAGGACTAGAATTAAGGTGGCTGGCCATTCTGC
GAAGAATATTCGAATTTGTCAGGATAAAATGAATCTACTATTTTGCAGTCTTTTGAGG
TTATTATTCTGCTCCGAGAAAAGAGCAGACAACCAAACCTCATAGAAATTTACGCTA
AAAAGATTTCTTAGTTTGAAAAATCCATATGGAAAACCTGTTGGCAAACCTCAGAAGC
TTAATCCAGGAGTGGGGCTTACCAAAGAATGGCGTGGTAATAGTGATATTTTATCT
ACTCTAAATTTAATGGAGGTGGTTTGTGACGATGGAACCATTAGATAGAATAATA
TTATTGAGATGCATGATCGATTGGAATTGTAGCTACTCCGCACTTTTCCATAATGAAA
TTCAAAGGCTCACTCACTTGAAAGGCGATACAGGGTTCAACCATCAAACCTTTTCACG
CCAGCAGGTTTGCTATGTGCGGGGCCAATAACATATTAGATAGTTGTGAAGTTTTAT
GCTCTTTGATGAGTCAAAGTTGGAAAATCGAAAGAAAAGGAAGCCCAGCGACAAA
GGAAAACCTGAGTAAGATCAATAGTCAGATGAAATTTCTAAAGGGTGTTCGGAAATCA
TTGAGCGAAAAAGTAACTACAGACAGATTACGAGCTGCAGTTAAAATAAATGAAGA
ATGGGGTGAATATTTTGC AAACGAATTTACACACACACCAATTGATGATCCCACCGT
AGACGAAATTTACAAGTTAAGGACATCAGAGTTTATGATAGCGAGAATTCCACGAGT
TGGAGATTTCTACTTACCACCATTCTGGATTGGCAACGAATGCAGTTCAGTAAACACT
AGTTACAGTTTCAATGACATGTCAACTTATCTTAATTACTTCGTAAAATTC AAAGAGG
AGGGTACAAAATACTGCCTGCAAAAACCGCACAAAATGAAAACAAGTGTC AACTTA
AACTTATATATAGGAACACTCCTGCATGTATCCGTAATTTACAGTTCAATGATGTTCA
CTTTGCCGAGGTGCCGCATTGGTTTGAAGTTGCAGGAGACTCGAATTC TTTGAGCAA
CTTCATTGAGTATTTGGAAAGTTTATCATCACTTACTGAAAATGACACCGATGATACA
AAAAAGGGTATAGACAATCTAATTGAGTTTTTGA AAATTTTCAGTATATTCATAAATG
AGACTATTCAGCGCATAACTGCTGCCCTACAGGCAGTACTGAAGGACGTCATTTGC
GAACAAGCTCTCAGAGAAGAACCACGGTGCATTACTCGAGTGATGTAATGGTGACG
TTTCCGAGGAAAGTGAAAATGAAGTTGACATTGACGTTAGCGATGACTATGATTCAG
AATATCTGAGTGAGGAGAATACATTGACAAGAAAAGGTGAAGATAGGACAGATAAA
TCTTTTGGGAAAAGAGAATTACACAATGGCGCTAAAGATTGTGATAGGAATTGTGAT
GATATAGAGATCTTCTCAGAACCCGTTAGGCAACTACAAGATAATTCTCGGGAAAAA
AGAAGCTTGAGGCGTAATGCCAGAAAAGGTCTATAG</refsequence-sequence>
- <refsequence-feature>
  <name_type>GENBANK_ACCESSION</name_type>
  <name_value>CAA99016</name_value>
  </refsequence-feature>
- <refsequence-feature>
```

```
<name_type>SGD</name_type>
<name_value>YOL017W</name_value>
<url>http://genome-www.stanford.edu/cgi-
  bin/dbrun/SacchDB?find+Sequence+%22YOL017W%22</url>
</refsequence-feature>
- <refsequence-feature>
  <name_type>GI</name_type>
  <name_value>1419793</name_value>
  </refsequence-feature>
- <refsequence-feature>
  <name_type>ORF_TYPE</name_type>
  <name_value>Verified</name_value>
  </refsequence-feature>
- <refsequence-feature>
  <name_type>ORF_STATUS</name_type>
  <name_value>No change</name_value>
  </refsequence-feature>
</refsequence>
- <refsequence>
  <refsequence-id>758</refsequence-id>
  <refsequence-species>2</refsequence-species>
  <refsequence-cds-start>1</refsequence-cds-start>
  <refsequence-cds-stop>2148</refsequence-cds-stop>
  <refsequence-chromosome>15</refsequence-chromosome>
</refsequence-
sequence>ATGCTACGGTTTACTCATCGAGGCCTTCCCTCCAGCACTCGTTTTAGAAAC
ATTTTCGTAAGGTTAAATCACATTTATGTACCATGGTTCTATGCCATAGACGTACCCA
ACTCCAAACCCTATTTACCCACATATCAAACCTTACACTCACCCAAAAAGTTTAAGCC
GTTCTCCGTTGATGATTCTAATCGTTTGGAAAAGGCCAGTAAGCGTCAAGAACGCAG
GCCTGTTTTAGTCAACGAAGATTACCTGTTTAAAGTCGACCTCTCTCATATGGAATTG
TCCCCTACCTATTGGGAAGGCCCTACTTATCAAGTACGAAGAGGTGTGTGGTTCGAC
TCTTCAAATCAACCTTTGTCCAGTGATCTTACCTCCGAAATTGAAGGGTTGTATAAGC
AGCTCAAATTCGACGACAGTAATGATGATCCGACCACGACACCTCCTGCAGAATCGC
AAGATATATTTAGGCTCAAAGGTAATACCCAGTCGATAAAGAAAACGAAGGAGAG
CAAAAAAATGGATCCAGCAATAAAGATGAGAACGAATCTACTTTCAAGTTTATTTTG
TTTGCCAATAAAACAAACTGCATTTTTACTATCGGATTTAGATGGAGGAAAACCTGCAAT
TAGCCTTTCTAAGGTCTAATCTGGCTCAATCCTTACCGATTAATGCTACAATGATTAC
AAGATCATACAAATATTCATCCTCCGCAACTACTAACAGACATCCACATCTTTAAG
GCAGCAAAAACGCCTCAAACGGAAGTAGCAGATGGTAGTAACAGTTCCAAATCGAG
GAGCATTGAAACAAAGTTAGAAAAGAAAGTTTCAAACCTCTTCAATTTATCGGACTT
TTTACAGTTGTTCAATGGTAATGCTAGTAAAGATCAAGATGATGCACAGAGCTTGGA
AAAGCAAATGGAAACAGACTATAACAATGCAGATAACAGTCAAGGCGCTAATGCTA
GTAGCAAAATAGAAGATGGCAAAAATTCGGGCGCAAGCGATAGACAAATTAGAAGT
AACAGAAGAGATGTGGATAACTTGATACTATGCGTTCACGGTATAGGTCAGACTTTG
GGTAAGAAGTACGAATACGTAAATTTGCGACACACGGTAAATCTACTTAGGTCTAAT
ATGAAAAAATCTACAATAATTCTGAGAACTACAATCATTAAACACAGCACCTGAT
TATAAAAGCAACTGTAACGTTCAAGTGCTACCCATCACCTGGAGGCACTCGATAAGT
TTCCAAACGGATGCTAAGGAGGAAAATATAGAAAATCCTGACCTACCGACTTTGTCA
CAAGTCACAGTAAATGGAGTGTTACCCTTGAGGAAGCTACTGGCTGACGGTCTACTA
GATATTTTGTGTATGTGCGAACCATACTACCAAGATATGATTCTACAACAAGTAACCT
CTCAATTGAACAAAACATATCGGATTTTTAAAGAATTTAATCCAGAGTTTGATGGGA
```

AAGTCCATTTAGTGGGCCATTTCGTTGGGTAGTATGATATTATTTGATATTCTATCCAA  
ACAAAAAATATGAATTAGAATTTCAAGTAGACAACCTGTTCTTTATTGGCTCACCA  
ATTGGATTGTTAAAGTTAATTCAAAGAACAAAAATTGGTGACCGTCCCGAATTTCCC  
AATGACTTGGAGAGAAAATTAACCGTACAGAGACCGCAATGTAAGGACATTTATAAT  
GTTTACCACGTCTGTGATCCCATTTCTTATAGGATGGAACCTCTTGTTAGTAAAGAAA  
TGGCTCATTACGAACAACTTATTTACCACATTGTAGTGAAGCTTATGGACTAECTTC  
TAAAGTTTTGGAATTTGGCGAAAACATATGGAAAGATTTGCCAGGTAAGTATGAAAA  
TAATTTGCAGTCCAAAAAACTTCTCCAGAAAAAAAAGAGGTCAAGTTATCAGAAAA  
TCTTACGAGAATGCTTACAGGTTTGAATTACACCGGACGTCTAGATTATGCTATGTCT  
CCAAGTCTGCTAGAAGTGGATTTTATATCAGCTATAAAATCACATGTTTCTTATTTTCG  
AAGAACCGGATATTGCAGCGTTTATCCTAAAAGAAATTTTAAGTAAACATGAAAATG  
CATCAGAAATATATGTA AAAAGAAAGACTGGTTGA</refsequence-sequence>

- <refsequence-feature>  
 <name\_type>**SGD**</name\_type>  
 <name\_value>**YOR022C**</name\_value>  
 <url><http://genome-www.stanford.edu/cgi-bin/dbrun/SacchDB?find+Sequence+%22YOR022C%22></url>  
</refsequence-feature>
- <refsequence-feature>  
 <name\_type>**GI**</name\_type>  
 <name\_value>**1420129**</name\_value>  
</refsequence-feature>
- <refsequence-feature>  
 <name\_type>**GENBANK\_ACCESSION**</name\_type>  
 <name\_value>**CAA99212**</name\_value>  
 <url><http://www3.ncbi.nlm.nih.gov/htbin-post/Entrez/query?db=p&form=6&uid=CAA99212&Dopt=g></url>  
</refsequence-feature>
- <refsequence-feature>  
 <name\_type>**ORF\_TYPE**</name\_type>  
 <name\_value>**Uncharacterized**</name\_value>  
</refsequence-feature>
- <refsequence-feature>  
 <name\_type>**ORF\_STATUS**</name\_type>  
 <name\_value>**No change**</name\_value>  
</refsequence-feature>  
</refsequence>
- <refsequence>  
 <refsequence-id>**4808**</refsequence-id>  
 <refsequence-species>**2**</refsequence-species>  
 <refsequence-cds-start>**1**</refsequence-cds-start>  
 <refsequence-cds-stop>**2160**</refsequence-cds-stop>  
 <refsequence-chromosome>**14**</refsequence-chromosome>  
<refsequence-sequence>**ATGTTGTTGGTACATATTATATCTTTCCTTCTGTTCTTCCAGCTTTCGGCC  
GCAAAGGCCCCACCCAGTAAAACGTCTCTAATAAATACTCATGAGAGAAGGTCGATA  
TATTCATGCTACGTTGGTTTACGTAAAGAAACATGGGGGTTCAATGGGTCCGCTATA  
TGTCGGTATGAACCAGCAATCCAATCGATGCTTTACTGTCTTTACGAAGACACGCATG  
AGAAAGGGTATTCAAATAAACTTTGGAGAAAGGTTTTGAAGAAATGAGACAATTTT  
GCTATACACCAAAGTTTTTGAACATGACTGATGCCGAGTTTTACACCTCATTGGATAA  
TGGAACATACTATATAAAGATCAACCTAAAGCTGGCATCAATATCACTTATCCTATC**

AGACTGAACACTACACTAAGAAAAGCATACTATGATGCATACTATGGTTACTACTAT  
AACCATGACATTCCGTATTATTTTCGGGGGCATTATCTGTGCATACTTTGTGGGTGTCA  
TGTTGCTTGCAGGTTTAATTCGTTTTTTGAATTATACCCCAATAAAAAAGATTATGTT  
TCAGCAAAGCTAGTCAATTACGTGAGAGGTTATACTACTCTACCCACTCTTTATGAA  
AAGCATGCAGAGCCCTTCTCGTACTTAAAAGTGATAACAGGCTATCTTCCTACTAGGT  
TTGAAACGTTGGTTATTTTAGGCTACCTCATACTTCATACCATTTTCATGGCCTACAA  
ATATCAATATGATCCATACCACATCATATTTGCCGCTCATAGAGCAGAAGTGGCACAT  
TTTGTGCGTACAGAAGCGGTATACTTTCTTTTGCACACCTGCCACTCATTGTTTTATT  
TGCGGGAAGAAATAACTTTCTCCAATTATTTCTGGCTTGAAGCATACTCATTATT  
GTGTTCCATAAGTGGCTGGGAAGAATGATGTTTCTTGATGCAATAATTCATGCTGCC  
GGCTTTACGAACTATTATTTGTATTATAAAAAATGGAATACGGTTAGATTAAGAGTCT  
ACTGGAAATTCGGTATTGCTACCACCTGTTAGCGGGAATGTTAATTTCTTTCCAT  
CGCAGCATTTAGAAGACACTACTATGAAACGTTTATGGCCCTCCATATAGTATTCGCA  
GCACTATTTCTCTATACTTGTGGGAGCATGTTACTAACTTCAGCGGTATCGAATGGA  
TTTACGCGGCAATAGCAATTTGGGGAGTTGATAGAATTGTACGTATCACCAGAATTG  
CACTCTTAGGATTTCTAAAGCAGATCTACAACCTGGTTGGATCTGATTTGGTCCGTGT  
AACGGTTAAAAACCAAAGAAGTTTTGGAAGGCAAACCAGGCCAATACGTTTTTCGT  
TTCCTTCTTGCCTCATTGTGCTTCTGGCAGTCGCATCCATTTACAGTGATGGATTCTT  
GCGTAAACGATAGAGAATTGGTCATCGTTCTGAAAGCAAAGAAAGGTGTGACAAAA  
CTGGTAAGAACTTTGTTGAACGTAAAGGCGGCAAGGCATCCATGAGATTAGCTATC  
GAAGGCCCTTATGGCTCCAAGTCCACCGCCATCGCTTTGATAATGTATTATTGTTGG  
CAGGTGGCTCAGGGCTTCCCGTCCAATTTCTCATGCCCTTGAATTAGGAAAGACAA  
CAGCTGCAAGCGGTAAAAACTTTGTACAGTTAGTCATAGCAGTAAGAGGACTAGACA  
TGCTCAACGCGTGTAAGAAAGAATAATGGCATTAAAGGGCTTGAATGTTCAAGTTC  
ACATTTATAATTCTAAGCAAGAGCTAGCTTCGGCTGAAAAAATTTCTCAAATGAAG  
TCAAAAACGGTGAAACGACAGCAGAGAAGGCCCATCTAGTCTAAGCAATTCAGAA  
AAAGCTCCTTCTGAAAGTGAAAATACAGAACTACCTCTTCCCTGAATGACACGTCTA  
TCTCCGATTTAGAATTTGCCACTTTCCATGTTGGAAGGCCAAATGTTGAAGAAATACT  
AAATGAATCTGTTAACCATTCTGTTCACTTGCCGTCGTATGTTGCGGACCACCTATT  
TTCGTGACACCGCTAGAAATCAAACCTGCCAAAGCTGTTATCAGAAACCCATCAAGA  
ATGATTGAATACTTGAGGAATACCAAGCCTGGTGA</refsequence-sequence>

- <refsequence-feature>  
<name\_type>GENBANK\_ACCESSION</name\_type>  
<name\_value>CAA96342</name\_value>  
<url><http://www3.ncbi.nlm.nih.gov/htbin-post/Entrez/query?db=p&form=6&uid=CAA96342&Dopt=g></url>  
</refsequence-feature>
- <refsequence-feature>  
<name\_type>SGD</name\_type>  
<name\_value>YNR060W</name\_value>  
<description>Similar to ferric reductases Fre1p and Fre2p</description>  
<url><http://genome-www.stanford.edu/cgi-bin/dbrun/SacchDB?find+Sequence+%22YNR060W%22></url>  
</refsequence-feature>
- <refsequence-feature>  
<name\_type>GI</name\_type>  
<name\_value>1302584</name\_value>  
</refsequence-feature>
- <refsequence-feature>  
<name\_type>GENE\_SYMBOL</name\_type>  
<name\_value>FRE4</name\_value>

```
</refsequence-feature>
- <refsequence-feature>
  <name_type>ORF_TYPE</name_type>
  <name_value>Verified</name_value>
  </refsequence-feature>
- <refsequence-feature>
  <name_type>ORF_STATUS</name_type>
  <name_value>No change</name_value>
  </refsequence-feature>
</refsequence>
- <refsequence>
  <refsequence-id>4202</refsequence-id>
  <refsequence-species>2</refsequence-species>
  <refsequence-cds-start>1</refsequence-cds-start>
  <refsequence-cds-stop>2163</refsequence-cds-stop>
  <refsequence-chromosome>13</refsequence-chromosome>
  <refsequence-
sequence>ATGAATTCGAATGAAGATATACATGAAGAACGCATTGAAGTTCACGAA
CTCCCCATCAAACCCAGCCAGAGAAAGACTCTGATCGCATCGCTCTCAGGGATGAAA
TATCAGTACCAGAAGGCGATGAAAAAGCATATTCGGATGAGAAAGTAGAAATGGCA
ACCACAAATGCATCCAGTAACTTTGGCTCAAATGAAAGTGCAAAAGACGGCGAATCA
ATCGGCGCCTTTTCAAATCCCATGAGGCTCTGATGCAGTCAAATTGAGAGAAGAA
TCCAGAGTAAACCATACTACCATCCGATGACCTCAGCCAGCAATTAGAAACCGAA
GAATCCAAAGTTGAAGAGGCTCTAAAAGAATAACCTCACCCCATTACCACCGAGG
GCTGACTGCATAGAAGAATCTGCATCTGCTCTTAAATCCTCATTGCCTCCAGTGCTAG
CAGGAAATAAAAATGATCAAGCCCCCTTGACCGACCACAGTTACCTCCGAGGCAGG
TAGTTAATGCGGAACTCTTCATTTGAAGGCGCCCCATGGTAATGCGACTCCCTCCAA
ATCACCACGAGTGCTGTAGGTAATTCTTCTTCATCGACCCCTCCAACCTTACCACCA
CGCCGTATAGAAGATCCTTTAGACTTGGCTGCTCAAAAACATTTCTAGCGAGTACAT
TTAAGAGAAATATGCTCTTTTATAAAAGTGAAGATAACTCTATCAAATGTGATTTGG
ATAAAAATATACTAAATTTAAAAGAAGATTCAAAAAAATTAACAACAATGAAATTC
CTGAAGAGGTTAGTTCATTTTGGTTAAAGGTTATCGGCGACTATCAAATATCTTAAT
AAACGATATCGAAACCTTACATTTCAAATCTCGAGGTATACCAGCCGCTTATCGA
TTGGTAGTCTGGCAGTTAGTAAGTTATGCAAAATCGAAATCCTTTGACCCTATATATG
AAACGTATCTAACGGAATGGCACCTTTTGACGTCCAGGAATTTGAAAATCAGCTAA
AATGATGGACGAAGTTCCTCTGAATACGTAAAACGCATAAGTAATGTGTTAAAGG
CTTATTTACTTTTTGACCCAGAGTGTGAGTTTTCTACCGACATTGCTTATATTATCAAT
ATGATTCTTGACGTTTTCGAGGAGGAGGCAAATGCATTTGGTCTACTTGTACGCCTA
ATGAAAGTTTACGGTTTAAGACTCTTGTTCTTACCAAGTGCTTCTGAGATCGATATTC
TTTGCTATAAATTTGATAGACTTGTAGAAGAATTTTATCCTGAAATTCACAACCACAT
GGTTGAAAAGGCGTCCGTTCTTCCATGTTTTTGCCCGGTTTCTTCACGACACTGTTT
CAAAGAACTTCCACTGAAATTCACCCACGTATCGGTGATATGGTATTTTTAGAA
GGTATTGACTCTATTATGAGAATTTTAGCCACACTTTTATCTAATTCACGAGACCATC
TGTTAAAATGGGTTTTGATGATATGCTGGAGCTATTGAAATCAGGTCTGTAGATG
CTTATATTAAGCAGAATGATGGTACACGCGGTGACACTCTTCTCTCAAATGAATGTAT
GGATAAATTACTACAAGACTCTATGATGAAAGTAGCAATAACCCCAAAGACTATGAA
GAAATATTCTTCTGAATATGAGGAAATTCACAGATTGGACAATGAAAAAGAAGTGCA
ATATAAGTCTATCACGGAAAAAATTTACATTTACAAAAGCATGTTTCGTAAATTAGA
AAACGACTACACATCTTTAAATAGAGAGCATGTGACAATTGCGAACGAGTTAGTGAA
AAATCGGCTTAATATCGAGTCTGTATTAATGAAAATAATGGTTACAAACTTCAAATT
TTAGATTTGAAGAAAAAGTTGGATTCAGAAAAAAGAAGCAAGTTTTAGGTGTATAT
GTGCCAATGATTTAAAGAAAGATTTGGAAGAGACAATGAAAAAGAATACCCAAGT
```



AATGGACGAAAATTTGAAATTGCAGGATAGGATTTTCAGAACTAGAAAGGCTTATTGA  
AGAAATAAAAACGCAAACAAAAATGGTACGTTATTTCGAATATTCTAATTCTAAAAA  
TAATCCTTTGGGAGCCGGCTGGTCAGGATTTAAAAAGGTTTTTAAATAG

- <refsequence-feature>  
<name\_type>GENBANK\_ACCESSION</name\_type>  
<name\_value>CAA87813</name\_value>  
<url><http://www3.ncbi.nlm.nih.gov/htbin-post/Entrez/query?db=p&form=6&uid=CAA87813&Dopt=g></url>  
</refsequence-feature>
- <refsequence-feature>  
<name\_type>SGD</name\_type>  
<name\_value>YMR192W</name\_value>  
<url><http://genome-www.stanford.edu/cgi-bin/dbrun/SacchDB?find+Sequence+%22YMR192W%22></url>  
</refsequence-feature>
- <refsequence-feature>  
<name\_type>GI</name\_type>  
<name\_value>642284</name\_value>  
</refsequence-feature>
- <refsequence-feature>  
<name\_type>ORF\_TYPE</name\_type>  
<name\_value>Uncharacterized</name\_value>  
</refsequence-feature>
- <refsequence-feature>  
<name\_type>ORF\_STATUS</name\_type>  
<name\_value>No change</name\_value>  
</refsequence-feature>  
</refsequence>
- <refsequence>  
<refsequence-id>4254</refsequence-id>  
<refsequence-species>2</refsequence-species>  
<refsequence-cds-start>1</refsequence-cds-start>  
<refsequence-cds-stop>2175</refsequence-cds-stop>  
<refsequence-chromosome>13</refsequence-chromosome>  
</refsequence>

sequence>ATGTTGTCTCAAACCTCCATACCGGAAGTGAAAGAAGACGTGATAGGCT  
ATGCGCTACACCAGAGGAGAGCCAGAGTGGGACAATTCCAAGACTTGGGTCCGCT  
GATTTAATTACTTTGATCAAATCGTTACCTTCATCCTCGAGCACAACAACTGCTACTG  
CCTCCGCCAACGATAACGGAGCAACTTCAAACATCAATGGACAAGATCCTACGACCA  
TAGTTACGGAGTTACATTCCCATGACAAATTAAGGGGCAGATCGGCACTTTCTTTTA  
CTGTATGGGTATCGATACTTCGGATCCAACCTTCTATTACAATCTTTGCCAAAAGATA  
ACCGATCTTTTCTTAGACACGCCCAAATTTGGTTTGGTAAGAAGAAGCACTTTCACG  
TATCGAAGATTTCTATCAGTTCTTGAATGCGTTTAGGAAATATGATGTTAACATTAT  
AGTTCACATTCCAGGAAGTGTGCAAACCTACATTATAAATAGCGACGGTGAACAATC  
GCAACTCCCTCCGTGGCAGAAGCGTCATCTGGCCGCAACTCACAGGATTTAAACGT  
CAACATGATTTGGGCGGAAACGTTTATGAGTGGTATTGTACGTGACATTATGATTAT  
GAAAGATAATCGTGCGGATGGAGAATCCAGAATTTGGTAGAAACACTAATTTTCAA  
TCCATTTACCTCGGGTGGAGTTGGAAGATGTTGCCAATAACTTTATTAACCTGTTCCCC  
TTGGTCTATGAAAAGGTGTTTATTTAGATGCACCTACTCACGTTTTAAATCCCTCGT  
TAACCAATAATTATTTAGTGGAACCTTTAGTGGAATAGTTAGGTTAACTAAGAGTT

TGGAAGCATGTCGTAAAATGCTCAAGAAGTTAATAGAAATTCATCCAGAAGCAGTAA  
TAATATTAATTCGTGTTTATTTTTCGTGCGATTTAGAGATAGATGCAGTTGACCTGAT  
CAACGAGCAACTAAATCCCCCTCTTCGTTCTTAGCCGACGATTCAAAGACTAGCCAT  
ATCCAGCTAATCTTCAAATCCGAATTATTAAGTATTCAAAGTGAATTCTTACTGGATG  
TCAAGAGAGATTACAAGCTTGCTAAGGAAGTAGCCATGGAGGCTGTTAACTGTGCAC  
CAAACGAATTTAAAACCTTGGTATTTATTGACTAGAATATACATTAACGATAT  
GTCAAATGCCTTGCTATCGTTAAACGCCTGCCCATGTCACAGGTTAAGGAAAAATA  
CGTTCTTAGAAGAATTGCGCCTATTACTTCAGATGAAAATCTTCATCTGCCATTACCA  
TTGGATGCCTCAATTGAGGAGATTTTCGTCATTGAACCCCATGGATGTCCAGTTGGAG  
CAAAGTCCGCAGATCCAAACCTAGTCAATCTCTGCGTCAAGTTTAAAGTCTACTT  
TCCAACCTAGCCTATAAATTATTGACAGAAATTGTCCAAATAACAGGATGGGAGCAGC  
TGTTGAAATATAGATCAAAAATTTTCGTTATGGAAGACGAGTACCAAGGCTCCACTT  
CTTCCATTGATGAAGCAGAAGTTCGCGGTAATGATATATCCAAAATGAGATCAAAGA  
GGCTATGCGAAAGATGGTTGGATAATCTCTTCATGTTACTATACGAAGATTTGAAAA  
CTTACACCGATTGGCAATCAGAGCAATTGTATTTTGTGCTCAAAACAGTAAATATCA  
CAAATTAACCTGTTGAATGGGAATTATTCGGCCTTTGTGCGAAAAGACTGGGACATCT  
TCCAGAAGCTGCGAAGGCTTTCCAAATTGGGCTTTCCCAAAGATTTTCTCCAGTATGC  
GCAAAGAATCTATTACAGTTTTACATTGACGAGCATAAGCGTATTAGGAGGGATTCA  
GTCTCAGCAAACCTCCGAGTTAACCTCTTCTCAAATATTGTCAAGTATCAATGACATCG  
ACAGCTCAATCATCGATCTAGTAGTCAAGATTTGTTGCTGGAATCATCGTTGGTACAT  
CGAGTTCTCAATAATATTAATAGATGCTCTGAGTGTGTCAGTACAAGATATGGGCAT  
TACTAAAGTACATAATGAAATTGCCTCTAGATTTTCTGACCCAGTAGCCCAATTGATT  
GACGATAACATTCTAAATTTTCTGAAGAATTTACGAATGACACTTTCGATAATTAG<

/refsequence-sequence>

- <refsequence-feature>

<name\_type>GENBANK\_ACCESSION</name\_type>

<name\_value>CAA90208</name\_value>

<url><http://www3.ncbi.nlm.nih.gov/htbin-post/Entrez/query?db=p&form=6&uid=CAA90208&Dopt=g></url>

</refsequence-feature>

- <refsequence-feature>

<name\_type>SGD</name\_type>

<name\_value>YMR237W</name\_value>

<url><http://genome-www.stanford.edu/cgi-bin/dbrun/SacchDB?find+Sequence+%22YMR237W%22></url>

</refsequence-feature>

- <refsequence-feature>

<name\_type>GI</name\_type>

<name\_value>887618</name\_value>

</refsequence-feature>

- <refsequence-feature>

<name\_type>ORF\_TYPE</name\_type>

<name\_value>Uncharacterized</name\_value>

</refsequence-feature>

- <refsequence-feature>

<name\_type>ORF\_STATUS</name\_type>

<name\_value>No change</name\_value>

</refsequence-feature>

</refsequence>

- <refsequence>

<refsequence-id>4790</refsequence-id>

<refsequence-species>2</refsequence-species>  
<refsequence-cds-start>1</refsequence-cds-start>  
<refsequence-cds-stop>2178</refsequence-cds-stop>  
<refsequence-chromosome>14</refsequence-chromosome>  
<refsequence-

sequence>ATGACATTATCTTTGCTCATTTCACCTACCTGTTCAATATTGTTGGGA  
TTAACTAATATTGCCTTGGCATCTGATCCAGAAACGATTCTAGTGACGATAACCAAG  
ACAAACGATGCAAATGGGGTTGTTACAACACTACAGTTTCACCCGCGCTAGTCTCCACA  
TCCACTATCGTTCAAGCTGGCACTACGACATTGTATACGACTTGGTGTCCATTGACGG  
TATCCACTTCATCTGCTGCCGAAATAAGTCCTTCAATATCGTACGCTACTACCCTATC  
CAGATTTAGTACTTTGACATTATCTACAGAAGTCTGCTCCCATGAGGCATGTCCTTCG  
TCATCGACGTTGCCAACCACCCTTATCTGTGACTTCCAAGTTCACTTCATATATT  
GCCCTACTTGTACACAACCGCTATCAGTCTATTATCCGAAGTAGGAACAACCGT  
GGTATCATCCAGCGCCATTGAACCATCAAGTGCCTCTATAATCTCACCTGTCACCTCT  
ACACTTTCGAGTACAACATCGTCCAATCCAACACTACTACCTCCCTAAGTTCGACATCTA  
CATCTCCAAGCTCTACATCTACATCTCCAAGCTCTACATCTACCTCATCAAGTTCGAC  
ATCTACCTCATCAAGTTCGACATCTACCTCATCAAGTTCGACATCTACATCTCCAAGT  
TCGACATCCACATCTTCAAGTTTGGACATCCACATCTTCAAGTTCTACATCTACATCCCA  
AAGTTCTACATCTACCTCATCAAGTTCGACATCTACATCTCCAAGCTCTACATCTACCT  
CATCAAGTTCACATCTACATCTCCAAGTTCCTAAATCTACTTCTGCAAGCTCCACTTCC  
ACTTCTTCATATTCAACATCTACATCCCAAGTTTGGACTTCTTCATCTCCAACCTTGGC  
TTCCACTTCTCCAAGTTCAACATCTATTAGCTCTACTTTTACTGATTCAACTTCATCCC  
TTGGCTCCTCTATAGCATCTTCATCAACGTCTGTGTCATTATACAGCCCATCCACACCT  
GTTACTCCGTCCCTTCGACTTCGTCAAATGTTGCAACTCCTTCTATGACTTCTTCAAC  
TGTTGAAACAACACTGTTAGTTCACAAAGTTCGTCTGAATATATCACCAAATCCTCAATT  
TCTACTACTATCCCATCATTTTCCATGTCTACATATTTACCCTGTTAGTGGAGTCCAC  
TACAATGTATACGACATGGTGTCTTATAGCTCTGAATCTGAGACTAGCACATTAACC  
AGTATGCATGAAACGGTTACAACAGACGCTACAGTCTGCACTCACGAGTCTTGCATG  
CCCTCGCAGACAACAAGTTTGGATTACATCTTCTATAAAAATGTCCACTAAAACGTCG  
CAACTTCTGTAAGCACCTCAACGGTTGAATCCTCATATGCATGCTCCACATGTGCTGA  
AACGTCACACTCGTATTCTTCCGTGCAAACAGCTTCATCAAGTTCTGTAACACAGCAG  
ACCACATCCACAAAGAGTTGGGTAAGTTCAATGACAACCTTCGGATGAAGATTTCAAT  
AAGCACGCTACCGGTAAGTATCATGTAACATCTTCAGGTACCTCAACCATTTGACTA  
GTGTAAGTGAAGCCACGAGTACATCAAGCATTGACTCAGAATCTCAAGAACAATCAT  
CACACTTATTATCGACATCGGTCTTTTATCCTCCTCCTTGTCTGCTACATTATCCTCT  
GACAGTACTATTTTGTATTTCAGTTCTGTATCATCACTAAGTGTGGAACAGTCCACG  
TTACCACACTTCAAATTTCTTCAACATCAGAGATTTTACAACCCACTTCTTCCACAGCT  
ATTGCTACAATATCTGCCTCTACATCATCACTTTCCGCAACATCTATCTCTACACCATC  
TACCTCTGTGGAATCGACTATTGAATCTTTCATCATTGACTCCGACGGTATCTTCTATT  
TTCCTCTCATCATCATCTGCTCCCTCTTCTCTACAAACATCTGTTACCACTACAGAAGT  
TTCCACTACTTCAATCTCATAACAATACCAAACCTTCATCAATGGTAACAATTAGCCAA  
TATATGGGCAGTGGATCGCAAACGCGTTTGCCATTAGGAAAGTTGGTCTTCGCCATC  
ATGGCAGTTGCTTGCAATGTAATTTTTCAGTTAA</refsequence-sequence>

- <refsequence-feature>  
<name\_type>SGD</name\_type>  
<name\_value>YNR044W</name\_value>  
<description>anchorage subunit of a-agglutinin</description>  
<url><http://genome-www.stanford.edu/cgi-bin/dbrun/SacchDB?find+Sequence+%22YNR044W%22></url>  
</refsequence-feature>
- <refsequence-feature>  
<name\_type>GI</name\_type>

```
<name_value>1302552</name_value>
  </refsequence-feature>
- <refsequence-feature>
  <name_type>GENE_SYMBOL</name_type>
  <name_value>aga1</name_value>
  </refsequence-feature>
- <refsequence-feature>
  <name_type>GENBANK_ACCESSION</name_type>
  <name_value>CAA96325</name_value>
  <url>http://www3.ncbi.nlm.nih.gov/htbin-post/Entrez/query?db=p&form=6&uid=CAA96325&Dopt=g</url>
  </refsequence-feature>
- <refsequence-feature>
  <name_type>ORF_TYPE</name_type>
  <name_value>Verified</name_value>
  </refsequence-feature>
- <refsequence-feature>
  <name_type>ORF_STATUS</name_type>
  <name_value>No change</name_value>
  </refsequence-feature>
  </refsequence>
- <refsequence>
  <refsequence-id>5039</refsequence-id>
  <refsequence-species>2</refsequence-species>
  <refsequence-cds-start>1</refsequence-cds-start>
  <refsequence-cds-stop>2181</refsequence-cds-stop>
  <refsequence-chromosome>15</refsequence-chromosome>
  <refsequence-
    sequence>ATGGCAAGTGTCATGTCAAATAATAATAATAATAATAATAATAATAATGC
    CAGTTATATGTTTACGAACCCTTTGTCCAACACAGGTGGTGGACTCATAAATGAAAT
    AAAAGATGCAATAAATGAAATGGAACAATTAAGGTTCTAGAGTTAAAGCAAATATG
    CAAATCTCTGGATTTATCCATAACGGGCAAAAAGGCTGTCTTACAAGACCGAATAAA
    ACAATTCTTAAGAAAATCCTGTGATATTGGACATATAGATCCGTGGAGGCCTAAGGC
    TATTAAGATTCTTATCGCGAAAGTAAGGATAAACTCATCATTACCAAATACTCTACC
    CTTTGGGAAACTTTAAAGACGGGTGCGTTCAAGCATCCTGTAGCATCGGGGCAACTA
    CCCGTGACAGCTCTCCAGAGTACTGCATTGCCACCTTATTCCCAACAACAGGCCTTAG
    CATATTCTTTTACCTCACCGTTTTACAAACCAATAGTACAAATACCGGATGCCAATAA
    AAAATTGAAGCAATCTGCAGGAAGAGGTTGTACAAAATGAAGTTCAAGGTAAGTA
    AATCTAATCATGATCTTTTCAAATCTAACAAGAGTTATAAACTGTATTTGTTTTCTGG
    CTTTTCAATACCGTTTATATATGAAACTGTGGGCCATGAGGCAATAGATTTCCCGTAT
    CCCTGTGAACTAGTGTTAATGGCACCAAACCTAGAGGACAACGTGAAAGGTTTAAAG
    AAACAAAATGGGACAGGTAATCCTGCAAATTTAACGCCTTATCTTAAAGTACCGACC
    GAGATGAATCACCTAGACTTACATTATCTCAATATTGATAAAGAGTACTCTATAAGTT
    GCTTTATAGTGGAAGTTTTTTACCTGAAGCTCTTCTGGGGAAAATTCTGAAAAGGCC
    CAAAATTATCAAGCAAGCCACCACAGCATACATCAAAGAACCTTGAATGAGCAAGA
    TGATGACGATATTATTACAACCTCCACGGTGCTGAGTTTGCAATGTCCTATATCTTGT
    ACAAGGATGAAGTATCCGGCGAAGACTGACCAATGTAAGCATATCCAATGTTTTGAT
    GCTCTCTGGTTTCTTCACTCTCAGTCACAAGTCCCTACATGGCAGTGTCCGATTTGTC
    AACACCCTATAAAATTCGACCAGTTGAAGATTTCCGAATTTGTAGATAATATTATTCA
    AATTGCAATGAAGATGTTGAGCAAGTTGAGATATCTGTTGATGGCTCATGGAAACC
    GATTCATAATAGTTCGGCCGTTATAACGGTACTGTTAACCAAATCACAGTGTGAA
```

AAACGAGAACCAAGGCACTGTCAAACAAGAGCAAGATTATGACAGCCGAAATGCCT  
TCGATACTAATTTGCGTAATGGTTCAAACCACAACGAACCCGAAATAATATCTCTGG  
ATAGCTCAGATGATGAAGCCTTTATTCCGGCTAGTAAAAGCTTCCCAACGCACGTGA  
ACCCCGTAATGACCAATTAAGAGCAGATATATTTCCCTCAGAATCGGAAGGATCCA  
GTGACTACAACCCCAATCATAACATCAACGCCGAAAGGTTCTCCAACATATGGACCAAG  
ATAATTATCAAGATGCTTTTCAAATGAGGTCATTTTTGAACCAAGGCGCTACTACAAA  
TATAAATGACACACCGACGAACAATAGCAGTATTAATTCTTTTCGTTACGGCGACGAA  
TGGTGACAGCAGAATATTCTACAATAGAGGGCCATCAACGCCACTATTACCGGCTGT  
TCTACAAAATTTGACTAATCAAACGGAAGCGCAGAGAAACCCCTACGGACCTAATTA  
CAATACCACAGCTCAAGATCGTAATCTTTTGGGAATCGAAGGTGATTTGCCTCCAATC  
CCCCCTGTGGACCCAAATTCAGAAGCAGAACTGAACTACCAACAAGGACCACATCG  
GCGGCACATCTCCCTCCATATATACACGTGAGCACCAGCGGCCATGGGGATGATGGA  
AAAATTAGGAAGAGAAGGCATTCTAATGTTTCTATCTACATTCCGAAGAATCCATAC  
GCCACCCTTATGAAACGGAGACCACAGGCAAATCACGCCATAATGAATAAAACTCTG  
GCCAAACTAATGACTTTAACACATCGGCTCAAGATAACTCGGAAGTGGTCGATTTA  
ACATCAGATTGA</refsequence-sequence>

- <refsequence-feature>  
<name\_type>**GENBANK\_ACCESSION**</name\_type>  
<name\_value>**CAA99362**</name\_value>  
<url><http://www3.ncbi.nlm.nih.gov/htbin-post/Entrez/query?db=p&form=6&uid=CAA99362&Dopt=g></url>  
</refsequence-feature>
- <refsequence-feature>  
<name\_type>**SGD**</name\_type>  
<name\_value>**YOR156C**</name\_value>  
<description>**interacts with C-terminus of CDC12**</description>  
<url><http://genome-www.stanford.edu/cgi-bin/dbrun/SacchDB?find+Sequence+%22YOR156C%22></url>  
</refsequence-feature>
- <refsequence-feature>  
<name\_type>**GI**</name\_type>  
<name\_value>**1420389**</name\_value>  
</refsequence-feature>
- <refsequence-feature>  
<name\_type>**GENE\_SYMBOL**</name\_type>  
<name\_value>**NFI1**</name\_value>  
</refsequence-feature>
- <refsequence-feature>  
<name\_type>**ORF\_TYPE**</name\_type>  
<name\_value>**Verified**</name\_value>  
</refsequence-feature>
- <refsequence-feature>  
<name\_type>**ORF\_STATUS**</name\_type>  
<name\_value>**No change**</name\_value>  
</refsequence-feature>  
</refsequence>
- <refsequence>  
<refsequence-id>**754**</refsequence-id>  
<refsequence-species>**2**</refsequence-species>  
<refsequence-cds-start>**1**</refsequence-cds-start>

<refsequence-cds-stop>2193</refsequence-cds-stop>  
<refsequence-chromosome>15</refsequence-chromosome>  
<refsequence-

sequence>ATGATTTCTGTTTGCCACAAAATGACTTGCAAAAATGCTACAGAAGCCT  
CACATTCGATGTTCCAGGACAACAATTCGAAGAGAGAAATGAACAAAACCTTAAAAA  
ACGGGCCAAAAAGAAAGGCAGTTTCCAACCATCTGTTGCCTTTGACACAGTGCCTTC  
CACCGCTGGTTATTCTTCTATAGACGACAGCAGGGAAGGATTCAAAGGTGTACCTGT  
TCCCAACTATTACAGATGGAAGAGTGCTATGACGATGAAACAGACTCTTTTTCGCC  
AAATTTGCAATATTATTTGAGAGATACATTCCAATCATCACTTTTCTGAATACTAGA  
AAAGAGAACAAATCTGAATCCAGTAGTTTTCCAATGAGATCCTCAAAGTTGTTGGAA  
AAGAATTCTGACATCAAAAAATATTTCTTGGTATCCAAGAATGGAAAAATAGTGAGG  
AGAGACTATCCAAGCACGCCAGTAATTGTCAACGAAACGTTGATGATAAACAGGTTT  
GAAAAGAAGTGGATAAAGTTATGGCGCAAAGAAAACACTCAAATAAATGAAAGGCT  
GAATGACAAAAAAAATGGTTTACTTACCCAGAACTTATCTTCTCTGAAGAGCGTAT  
TAAACCGTTATATAGAGGAGATGATAGTGCACCATGTACAAAAGAACAAAAAAGAA  
AGCATAAAATACTTCAACAAAAGGTCGGATATCCCAATAACCCTAAGACAATAGTTT  
GTCACATTAACGGAAAAAACAATACGTGGGTTGCCCTAGACTGGACAGTCTACAAGT  
TTGCACGAAATCTTGATCACATTGTTGTCATAACTACTGCCAAAAATGATTTCTAA  
CAGGAAAAAACTGCAAAAGATGATACAGAATGGGCACCCGGGATATCAAAAAGAAG  
TAATAGATCAAAAATTAACGACATTTTTGATTATATTTTACAGCTAGTAAAAGTGGT  
CAAAATATCCGTCAAATTACTTTAGAAATAATTGTAGGCAAAATTAAAAAAAGTCT  
GGTAGATGTCATTAATGTCCATACTCCAGATTTCTTAGTTCTTGCTACTTTAAAGCAC  
GAGCGAAATGAGAATCTTATTACATATAAATCCAAAAGCTGACAGATGTCTTTCCT  
GTTAGTTATCCGATCCCACATTTGTTGTTCCCTCGAAACGAATGTATTCGTTCCGAAC  
TGAATCTACAAAGAGAAGTAAATGAACATTATGTCTCAAAAAATCATATGAAGCACG  
AACACACTGACGTTGAGAGCATGAGCAGTTCAATGTTCAAAAAAATACAATATCAG  
ATATTTCTTACATATTTCCGTAGATTCGTACGCCGAAGATTTCAAAGGCAAGGCTA  
CATCAAAAAGCAGTTCAACACCTCTAATGATTCCATTCCAAGAAAATTGACCGGTCTC  
GCCAGCATTCAAGAAGGAAGATCACGGGTGATATAGAAAATTACAAGACGATGA  
GAAAGATAGAGAATGTACTAAGGAAAACTTTTGTGGAAGAAAATTGATATCATAAT  
TAGAGAGTCATTGAAGTCTTCTTTAGCGATAGAGACGTTGCCTGGTAAAAATGTATC  
GCAGTCCAGTCACGGTGACCAAATTTCCAGCTTTAAGAATGCTTTGATAGGCAATGG  
GTCGAAAAACACAAAGTTTAGAAAATCTTTAATACCATATTCTTCTCAGAGGAACA  
AAATACCACAACAATACTAATAACTCAGTAGCTCGCCTACGTCCCAAATCAAGTTTGCA  
ACCTCTGTA AACACAAAGATGGAAGAGCCGCCCTTGGCAAAGCCAGAAATCTGCCT  
GATATAAGGCACAGTATTTCTTTCGACAAAGAAAATTCCTTTGATCCATCTGATAAAA  
GCAGTAGTGTTGATAATAGCATTCTTTGAGGAAAGTTAAAAGTGCCGGTGCGTTAA  
GAAAAGTCAAACTAATGACTCCTCAAGTAGTGACAGGGTCAAAGAAAAGCTCGTCTA  
GTTTTAGTACTGTGAACACCTTCACTGGGGGTGGAGTTGGGATTTTTAAGGTGTTTA  
AAAGTGGAAGTTCCTCTGGAAATAAATCATCCAGTAGAAGGAATAGTAGCAGTGGC  
GATGTTTTTGAAGTGATGATCGTAACGACAAGAAAAAGAAGAAGAAAAAAAAGAA  
GAAATCATTGTTCTTATTCCGGCAAAATATGA</refsequence-sequence>

- <refsequence-feature>  
<name\_type>SGD</name\_type>  
<name\_value>YOR019W</name\_value>  
<url><http://genome-www.stanford.edu/cgi-bin/dbrun/SacchDB?find+Sequence+%22YOR019W%22></url>  
</refsequence-feature>
- <refsequence-feature>  
<name\_type>GI</name\_type>  
<name\_value>1420123</name\_value>  
</refsequence-feature>

```

- <refsequence-feature>
  <name_type>GENBANK_ACCESSION</name_type>
  <name_value>CAA99209</name_value>
  <url>http://www3.ncbi.nlm.nih.gov/htbin-
    post/Entrez/query?db=p&form=6&uid=CAA99209&Dopt=g</url>
  </refsequence-feature>
- <refsequence-feature>
  <name_type>ORF_TYPE</name_type>
  <name_value>Uncharacterized</name_value>
  </refsequence-feature>
- <refsequence-feature>
  <name_type>ORF_STATUS</name_type>
  <name_value>No change</name_value>
  </refsequence-feature>
</refsequence>
- <refsequence>
  <refsequence-id>4298</refsequence-id>
  <refsequence-species>2</refsequence-species>
  <refsequence-cds-start>1</refsequence-cds-start>
  <refsequence-cds-stop>2199</refsequence-cds-stop>
  <refsequence-chromosome>13</refsequence-chromosome>
  <refsequence-
sequence>ATGACCACACAAATAAGGTCTCCCAAGGCTTGCCGTATCCGATTCAGAT
CGATAAACTCATTCCAAGCGTAGGTTTCGTACCTTCATGAGGGTGATAGGTTGCTTGT
CTATAAGTTCTGGTATTTGGTGGAAAGGGCCTCAGACACTGGTGACGATGATAACGA
GCACGATGTTTCCCCGGCGGCAGCGCCGGAAGTAATGGTGTCTCTCCGCCAACCAA
ACAACACTGCGTGAATCCATAGAATTCTTCGAAAGTCCCTACGAGGGGGACTTGATTAG
TTGGAATGTAGACGTAGGAGATGAAGTAGCCACTGCTAACCAAGTGATTTGCGAAAT
AAAAAGGCCATGTAACCATGACATCGTGTATGGCGGGCTATGTACTCAATGCGGGAA
AGAAGTTTCTGCAGATGCCTTCGATGGTGTACCACTAGACGTTGTCGGGGACGTGGA
TTTACAGATTAGCGAGACAGAAGCCATTAGAACAGGCAAGGCATTGAAGGAGCATT
GCGACGGGATAAGAACTTATCTTAGTGGTGGATTTAGATCAAACCATCATCCATTG
TGGCGTGGACCCTACGATTGCAGAGTGGAAGAACGACCCCAATAATCCGAATTTTGA
AACATTAAGAGACGTCAAGAGCTTTACGTTGGATGAGGAGTTAGTACTCCCCTTAT
GTACATGAATGACGATGGTTCTATGCTGAGACCGCCTCCCGTAAGAAAATGTTGGTA
CTACGTGAAGGTAAGGCCCGGTTTAAAGGAATTTTTCGCTAAAGTGGCGCCTCTTTTT
GAAATGCATATCTACACAATGGCTACAAGGGCTTATGCCTTGCAAATTGCCAAAATC
GTGGACCCTACGGGCGAATTGTTTGGCGATAGAATTCTGTGCGGTGATGAAAATGGG
TCTCTAACAACTAAATCATTAGCTAAACTTTTTCCCCTGACCAGTCAATGGTTGTAG
TTATTGACGACAGAGGTGATGTTTGGAAATTGGTGTCCAAACTTGATCAAAGTTGTT
CTTATAACTTCTTCGTTGGTGTAGGTGACATTAATTCTAATTTCTTGCCCAAACAATCT
ACAGGAATGCTACAACCTAGGGAGGAAGACAAGACAGAAGAGCCAAGAATCTCAGGA
ACTGCTGACGGATATTATGGATAACGAAAAAAAAACTACAAGAAAAGATAGATAAAG
AAGTTAAACGCCAAGAAGAAAATTGAACCATCAACTGGCGACTGCTGAGGAGCCTC
CTGCGAACGAATCCAAAGAAGAGTTGACCAAGAACTAGAATATTCAGCATCTTTAG
AAGTCCAACAACAAAATCGACCCTTGCCAAACTACAAAAACACCTGCATGATCAAAA
AACTACTAGTTGATGACGATGATGAACTATACTACTTAATGGGTACGCTATCAAACA
TTCACAAAACCTTATTATGATATGCTCTCACAAACAAAATGAGCCAGAACCAAATCTGAT
GGAAATCATACCAAGTTTGAAGCAAAAAGTCTTCCAAAATTGCTATTTTGTTTTTTCA
GGATTAATACCCCTCGGGACCGATATTCAAAGGTCGGACATAGTGATATGGACGAGT
ACATTTGGTGCCACTTCCACTCCAGATATAGATTACCTGACGACACATTTAATCACCA

```

AGAACCCTAGCACTTATAAAGCGCGTCTAGCGAAAAAGTTCAACCCACAGATTA  
TTGTTACCCAGATTGGATATTTGAGTGTGGTAAATTGGAAAAAGGTGGATGAAA  
AACCTACACGTTAATCGTGGACAGCCCCATCTCCGACGAGGAATTACAAA  
AAACACAATTACAAAAAGACAAGAATATCTGGAGGAGACCCAGGAACAACAGCAT  
ATGTTGACATCACAAGAAAATCTAAATTTATTCGCTGCTGGTACTTCATGGTTAAACA  
ATGACGACGATGAAGATATTCCGGACACAGCTAGCGACGACGACGAAGATGACGAC  
CACGACGACGAAAGTGATGACGAAAACAACCTCGGAAGGCATTGACAGAAAGAGGAG  
CATCGAGGACAATCATGATGATACATCACAAAAGAAGACCAAGGCGGAACCTTCTCA  
AGATGGTCTGTACAACATAAAGGAGAAGGGGATGACAACGAAGACAGCGATTCCG  
AGTTGGAGGAAGAGTTGATGGATATGCTGGATGATTAG

- <refsequence-feature>
  - <name\_type>GENBANK\_ACCESSION</name\_type>
  - <name\_value>CAA89775</name\_value>
  - <url><http://www3.ncbi.nlm.nih.gov/htbin-post/Entrez/query?db=p&form=6&uid=CAA89775&Dopt=g></url></refsequence-feature>
- <refsequence-feature>
  - <name\_type>SGD</name\_type>
  - <name\_value>YMR277W</name\_value>
  - <description>TFIIF interacting component of CTD phosphatase</description>
  - <url><http://genome-www.stanford.edu/cgi-bin/dbrun/SacchDB?find+Sequence+%22YMR277W%22></url></refsequence-feature>
- <refsequence-feature>
  - <name\_type>GENE\_SYMBOL</name\_type>
  - <name\_value>FCP1</name\_value></refsequence-feature>
- <refsequence-feature>
  - <name\_type>GI</name\_type>
  - <name\_value>825543</name\_value></refsequence-feature>
- <refsequence-feature>
  - <name\_type>ORF\_STATUS</name\_type>
  - <name\_value>No change</name\_value></refsequence-feature>
- <refsequence-feature>
  - <name\_type>ORF\_TYPE</name\_type>
  - <name\_value>Verified</name\_value></refsequence-feature>
- <refsequence>
  - <refsequence-id>822</refsequence-id>
  - <refsequence-species>2</refsequence-species>
  - <refsequence-cds-start>1</refsequence-cds-start>
  - <refsequence-cds-stop>2241</refsequence-cds-stop>
  - <refsequence-chromosome>15</refsequence-chromosome>
  - <refsequence-  
sequence>ATGTCGTATAAATTTATTACCAAGAACAAAAATACACCCCGATGTCTTC  
CCCAGGGAATTCAGGCGTGGCTATAGATTCTACCGTTCTGAAAGCAATTGAATTAGG  
AACGAGGCTTTTTAAATCTGGAGAATATTTGCAAGCGAAAAGGATATTCACAAATGC



TTTGAGAGTATGTGATTCTTATTCTCAGGAGCAGATTATGCGCATTAGGAACGCGTA  
TCAATTAGATACTGCGAGACCGGATAACAAACGATTATATCATCCTAGATACATAAA  
GATATTGGATAACATCTGTGCGTGCTACGAAAAATTGAATGATTTGAAATCTTGTTG  
GACGTATCACAAGGTTACTTAAGTTAGAACCAGGTAATATCAAATGCTATATACGA  
TGTACAAGGACGTTGATAAAATTAAGACTGGAAAAGGGCATATAAAACATGTTCT  
CGTGGACTGCAATTATGCAATAACGATAGCAATCATCTAAGACAACAAAAACAATTC  
ATTAATAAACATGGTTCAAAAAACAGGACGGCAAGAGAAGTTATATAGATCCATTA  
GAGGAGACCAAAATAGCAAAAAAAAAAAGAATAATAATGTTCTAGAATCGTTACC  
AAAGAAGAAGATTAAGGTAGTACCAAGAAAACGATTAGTTGGCAATTTGCCGAT  
AGAAATACTACCTATCATATTCCAAAGGTTTACCCTAAGGAGCTTGTTACGTTGTCG  
CTAGTTTGTAAACAATGGAGGGACAAAATTTTGTATCATTTAGACTGCTTCCAAGAAT  
TCAACTTGGCACCAATAAATTTTAAAAATTTTGTAAAGTTTATGGATTTTTTACAACA  
GAATTTACCAGGACGTATAGAAAATATATTCTTTCACAAGTAAAAGTCAGTTCTAG  
AATCACTTCGGAAGAGTTACGAATAACTCAATTATTATTAGTAAAATGCCGAAATG  
TATAACATCGAACGGCTTATACTGTCAATGCCAACACTAATAACAACAAAATCTTT  
AAGTTAATGGTTAGAGGAGGCACAGATTTTTTTACAAGGCTGCTGGAATTATCTCTC  
ATGATAACTTATAGGCCTGATAAACAACATGAATTGGAGATACTGCAGACTTGTCTC  
CTGTTGAAAAAATAGAATTAATTTTTGTCAATCACTGGTACCAATTTTCGACGGAA  
ATAATAGCGTTGGGAGGGATGGAAGTTTCAATGTGATGGCCCGTCATACTAATATGC  
AGATATCCACTGCGGATAATGATGAACAGGGAATAGTAGAAGAAAAGGTGATTTAT  
AGTGAGCTAGAGAAGATAACATTGATATGTGATAAGAAGAAAATTAAGAATTTTCCA  
CTTTGTCGTGCTCTATTAAGAGGCCAGTTTCTCTATTGCAGAACTGACGATAACTG  
GTGTAACATTTCTATGAATAATCAAGACATAATGAATTTTCAATGGCTATTGAACTT  
CCCAGACCTAAAAGAAGTATGGATAGAAGATAACGACAAGTGAAGTGAAGTGAAGT  
TTTGCAATTGTTAAAATTTTGAATGTCTGGAAAAACTTGGAAAAGTTAACCTTTAGA  
GAGAACAAGCTATATCCAATTGTTAATTTGGATGAAGATCAGCCTGTTACGAATGAC  
GACGAGGTGCCATCCATGCTATTTTACAAGGAAAATCTCCAAAACCTGGAAAAGTTG  
GATCTAATGGGGACATCGATAAGTGGTTCTGCGTTGACTAGATTATGCGAGCAGGAA  
TACTTGGATGGTCGGAAATTAAGAAGTTTAAACATTGGGAATTGCCCAACATCCAG  
TTCCCAAATAATCACGCTCATAACAGCAAGGATGATACTGGATGTGAATGCAGTTTTG  
AAGAGACTCTCCAAGTTGGAAGAAATAAATTTATCGCATCTCAGCTCCTTGAATGAT  
AGTACGATGAAGTCATTATTATTAATGTACCATTTTTGGAAAATTTAAAGAGGCTTG  
ACATTTGCGACAATTTTGAATTACAGGAATATCAATATATGAATTTCTAAAAAAT  
TCAGATGGATCATGACAACGAAGCGGGAGGTCAACCACTGGCATATTTAAATATTGA  
CGGATGTTCCCAAGTGTCTCATATCACAGTTAATATGATCCGAGCGCAGAAGTATTG  
ACTCAAGTGGATTGTGTTTATGAAAGAGATGTATGGAGAAAATTTGGAATTAATCA  
TATTCATACTCATAG</refsequence-sequence>

- <refsequence-feature>  
<name\_type>**SGD**</name\_type>  
<name\_value>**YOR080W**</name\_value>  
<url><http://genome-www.stanford.edu/cgi-bin/dbrun/SacchDB?find+Sequence+%22YOR080W%22></url>  
</refsequence-feature>
- <refsequence-feature>  
<name\_type>**GI**</name\_type>  
<name\_value>**1420241**</name\_value>  
</refsequence-feature>
- <refsequence-feature>  
<name\_type>**GENBANK\_ACCESSION**</name\_type>  
<name\_value>**CAA99273**</name\_value>  
<url><http://www3.ncbi.nlm.nih.gov/htbin-post/Entrez/query?db=p&form=6&uid=CAA99273&Dopt=g></url>

```
    </refsequence-feature>
- <refsequence-feature>
  <name_type>ORF_STATUS</name_type>
  <name_value>No change</name_value>
  </refsequence-feature>
- <refsequence-feature>
  <name_type>ORF_TYPE</name_type>
  <name_value>Verified</name_value>
  </refsequence-feature>
  </refsequence>
- <refsequence>
  <refsequence-id>823</refsequence-id>
  <refsequence-species>2</refsequence-species>
  <refsequence-cds-start>1</refsequence-cds-start>
  <refsequence-cds-stop>2250</refsequence-cds-stop>
  <refsequence-chromosome>15</refsequence-chromosome>
  <refsequence-
sequence>ATGTCTAATACCTTGCCAGTAACAGAATTTCTTTTATCCAAATACTACGAA
CTTTCCAACACTCCTGCCACAGACTCATCATCGCTCTTCAAATGGTTATAACCACAAGA
CTCTCTCCCGTAAACAGCTGCTCATATCCGATTTGTCTTCCCAGAAAAACACGCCAT
CTCCTACGATCAATGGAATGACATAGCGTCGCGATTAGACGACTTAACGGGACTTTC
CGAATGGAAAACAATCGACGAGTCCTCGTTGTATAACTATAAGCTGCTGCAAGACTT
GACCATCCGTATGCGCCATTTGAGAACCACTCACGACTACCACCGCCTGCTTTATCTG
ATTAGAACTAAGTGGGTCCGTAATCTTGCCAACATGAATAACGTTAATCTTTACAGG
CACTCGCATACCGGCACAAAACAAATTATACATGACTACCTAGAAGAGTCTCAAGCA
GTGCTCACCGCGCTGATCCATCAGTCAAATATGAACGATCACTATCTCCTCGGTATTT
TGCAACAGACGAGAAGAAACATAGGGCGCACGGCTCTCGTGCTTAGCGGTGGGAGC
ACTTTCGGCCTTTTCCACATTGGTGTCTTGCCGCCCTTTTTGAATCGGACCTGATGCC
TAAGGTGATCAGCGGTAGCAGTGCTGGCGCCATTGTTGCCAGCATATTTGCGTCCA
CACGACCCAGGAAATTCCTCCTTGTTGACCAATGTACTIONAATATGGAGTTAACATC
TTCAATGACGACAATTCCAAATCTCCCAACGAAACTIONAATCAAGATATCGAGG
TTCTGCCAAAACGGTACCTGGTTCAATAATCAACCTTTGATTAACACAATGCTTTTCGT
TTTTAGGAACTTGACCTTTAGGGAAGCCTACAACAAGACTGGAAAAATCCTGAATA
TCACAGTCTCGCCTGCTTCCATATACGAACAGCCGAACTACTAAACAATTTAACCGC
TCCAAACGTTCTCATCTGGTCTGCCGTATGCGCATCTTGTTCTCTACCTGGAGTTTTCC
CCTCCACGCCGCTATTCGAGAAAGATCCTCACACTGGAAAGATTAAGAGTGGGGGG
CAACAAATTTACATTTATCAAACATGAAATTCATGGACGGATCTGTAGATAATGACA
TGCCCATTTCTCGTCTTTCTGAAATGTTCAATGTCGACCACATTATCGCCTGCCAGGT
AAATATACATGTCTTTCCCCTGTTAAAGTTTTCAAACACTTGCGTTGGGGGTGAAATT
GAAAAGGAAATTACCGCCCGTTTCAGAAACCAAGTAACAAAGATCTTCAAATTTTT
TCCGACGAACTATTCATTTTTAGACATCCTAAAGGAGCTTGAGTTCCATCCCTATT
TGATGACCAAATTGAAACACCTTTTTTTACAACAATACTCTGGCAATGTCACAATTT
ACCCGATCTATCAATGGTTGGTCAATTCCACGAAGTATTGAAGAACCCATCTCAACTT
TTCCTATTGCACCAACTIONTTAGGTGCAAGAGCTACTTGGCCGAAAATTTCCATGA
TTCAAATAACTIONGTGGCCAAGAATTCGCCTTGATAAGGCCATCACATTCCTAAAGG
AGAAAATAATAATCTCTTCGTCAATAAAAAACCTTTACAATTCTACCAACCTCGATT
CAGTGAGCAAATCAAATCTTTCCATAATGGATGCTGACTTGCCGGGAGTTGACTT
GGAAGAATCCTCCTCCAATTCATATCAATTATCAAGTCTCCAACAAAACAGCGGCA
CCGGGAAGATTTCTCCTCAGCCATTGCCTTCTCATCTTCTACCTTCAACAAGAGGA
AAATGGATATGTTATCGCCTTCTCATCGCCTTCTACATCTCCACAACGTTCAAATC
TTCATTCACGCAGCAGGGTACAAGGCAGAAGGCAAATTTTATCGTTTGCCATCGG
TGCATCTAGTTTACGGCTAAAGAAATCACCATTGAAGGTTCCATCACGACCTCAATTC
```

AAAAAAGATCTTCTTATTATAATCAAATATGTCGGCAGAGATGAGGAAAAATAGA  
AAAAAATCTGGAACAATTTCTTATGATGTTCAAACAACTCAGAAGATTTTCCCA  
TACCGGCTATTGAAAACGGTTCATTTGATAACACTTTATTCAATCCAAGCAGGTTCCC  
CATGGACGCTATGTCGGCTGCCACAAACGACAATTTATGAACAATTCAGACATTTT  
CAAATTGA</refsequence-sequence>

- <refsequence-feature>  
<name\_type>**SGD**</name\_type>  
<name\_value>**YOR081C**</name\_value>  
<url>**http://genome-www.stanford.edu/cgi-bin/dbrun/SacchDB?find+Sequence+%22YOR081C%22**</url>  
</refsequence-feature>
- <refsequence-feature>  
<name\_type>**GI**</name\_type>  
<name\_value>**1420243**</name\_value>  
</refsequence-feature>
- <refsequence-feature>  
<name\_type>**GENBANK\_ACCESSION**</name\_type>  
<name\_value>**CAA99274**</name\_value>  
<url>**http://www3.ncbi.nlm.nih.gov/htbin-post/Entrez/query?db=p&form=6&uid=CAA99274&Dopt=g**</url>  
</refsequence-feature>
- <refsequence-feature>  
<name\_type>**ORF\_TYPE**</name\_type>  
<name\_value>**Uncharacterized**</name\_value>  
</refsequence-feature>
- <refsequence-feature>  
<name\_type>**ORF\_STATUS**</name\_type>  
<name\_value>**No change**</name\_value>  
</refsequence-feature>  
</refsequence>
- <refsequence>  
<refsequence-id>**749**</refsequence-id>  
<refsequence-species>**2**</refsequence-species>  
<refsequence-cds-start>**1**</refsequence-cds-start>  
<refsequence-cds-stop>**2274**</refsequence-cds-stop>  
<refsequence-chromosome>**15**</refsequence-chromosome>  
<refsequence-

sequence>**ATGATGCGTGGTTTCAAGCAAAGATTAATAAAGAAGACCACCGGGTCTTC  
TTCTTCTTCAAGCAGTAAAAAGAAGGACAAAGAGAAGGAAAAAGAAAAAGTTCCA  
CTACCTCATCCACATCAAAGAAGCCCGCTTCGGCTAGTAGCTCTTCCCACGGGACTAC  
TCACAGTTCTGCCAGCAGTACCGGATCAAAGTCTACAACCTGAGAAGGGCAAGCAATC  
TGGTAGTGTTCCCTCGCAAGGGAAGCATCATAGTAGCTCTACATCAAAAACAAAAAC  
AGCGACGACCCCTTCTTCCAGCAGCAGTAGCAGTAGAAGTTCAAGTGTGAGTCCGCTC  
CGTTCAAGCTCCACAAAGAAAACAAGTTCAAGAAAAGGACAAGAACAGTCCAAAC  
AATCGCAACAGCCATCACAATCTCAAAGCAAGGATCTTCTTCATCATCTGCCGCTAT  
AATGAACCCCACTCCAGTACTCACTGTTACTAAGGACGACAAAAGCACTTCTGGTGA  
AGATCATGCACATCCTACTTTGCTGGGGGCAGTATCCGCTGTTCCATCATCTCCCATT  
TCAAATGCTTCAGGTACAGCAGTTTCTTCTGATGTAGAAAATGGTAATAGTAATAAT  
AACAAATATGAATATTAATACTAGTAATACTCAGGATGCAAACCACGCCTCCTCACAA  
AGTATCGACATTCGAGATCATCACTCATTGAGAGACTACCAACACCCACAAAA  
CTTAACCCTGACACAGATTTAGAGTTAATTAAGACTCCCCAACGTCATTCTTCATCTA**

GATTCGAGCCATCTAGATATACGCCATTAACGAAATTGCCAAATTTAATGAAGTTTC  
TCCTGAAGAAAGAATCCCTTTGTTTCATTGCCAAAGTTGACCAGTGTAACACTATGTTT  
GACTTTAATGATCCAAGTTTTGACATTCAAGGTAAGAGATTAAAAGAAGCACCTTA  
GATGAGCTAATAGAATTCCTTGTAACAAATAGGTTCACTTACACGAATGAGATGTAC  
GCTCATGTGGTGAACATGTTCAAATCAATCTGTTTAGACCTATTCCACCACCAGTAA  
ATCCAGTTGGTGACATTTATGACCCAGATGAAGATGAACCTGTTAACGAACTAGCCT  
GGCCTCATATGCAAGCTGTTTACGAATTCCTTTTAAGGTTTGTGGAAAGTCCTGATTT  
CAATCATCAGATTGCTAAACAATATATTGATCAGGACTTTATTTTAAAGTTACTGGAA  
TTATTTGATAGCGAAGATATCAGAGAAAGAGACTGTTTGAAAACGACTGCATAGA  
ATATATGGGAAGTTCTTATCATTAAAGAAGCTTTATTCGTCGGTCGATGAATAATTTT  
TTTTGCAATTTATTTATGAGACTGAGAAGTTTAAACGGTGTGGCAGAATTGTTAGAAA  
TTTTGGGTTCCATAATTAATGGATTTGCACTTCCATTAAGGAAGAGCACAAGGTTTT  
CTTGGTGAGGATATTGATACCATTACACAAGGTCCGTTGTTTATCATTATACCACCCT  
CAGTTGGCTTACTGTATCGTTCAATTTCTCGAAAAAGATCCTTTATTAACCGAAGAGG  
TAGTTATGGGCTTACTGCGTTATTGGCCAAAAATAAATCCACAAAAGAGATAATGT  
TTCTAAATGAAATCGAGGATATTTTTGAAGTGATCGAACCGCTGGAATTTATTAAG  
TAGAAGTTCGTTATTTGTTCAATTAGCTAAGTGATTTCTTCTCCACATTTCCAAGTG  
GCGGAAAAGGTTTTAAGTTATTGGAATAATGAATATTTCTTAACTTATGTATCGAA  
AATGCCGAAGTCATCCTACCCATTATATTTCTGCATTATATGAATTAACCTTCTCAGTT  
AGAGCTAGATACAGCAAATGGCGAAGATAGCATTTCAGACCCTTACATGCTTGTGA  
GCAAGCAATCAATTCTGGTTCGTGGAATAGGGCAATTCATGCTATGGCATTCAAGGC  
ATTGAAAATTTTTCTGGAACAACCCAGTATTGTACGAAAACCTGTAATGCATTGTAC  
TTATCAAGTGTAAGAAGAACTCAACAGCGTAAGGTGCAACGTGAAGAAAATTGGAG  
CAAACCTGAAGAATATGTAAAAAATCTAAGGATTAACAATGATAAGGACCAATACAC  
AATCAAAAACCCAGAATTAAGAAACAGTTTCAACACAGCAAGTGAGAATAACACATT  
AAATGAAGAGAACGAAAATGATTGTGACAGCGAGATACAGTGA</refsequence-

- <refsequence-feature>  
<name\_type>**SGD**</name\_type>  
<name\_value>**YOR014W**</name\_value>  
<description>**B-type regulatory subunit of protein phosphatase 2A (PP2A)**</description>  
<url><http://genome-www.stanford.edu/cgi-bin/dbrun/SacchDB?find+Sequence+%22YOR014W%22></url>  
</refsequence-feature>
- <refsequence-feature>  
<name\_type>**GENE\_SYMBOL**</name\_type>  
<name\_value>**RTS1**</name\_value>  
</refsequence-feature>
- <refsequence-feature>  
<name\_type>**GI**</name\_type>  
<name\_value>**1420113**</name\_value>  
</refsequence-feature>
- <refsequence-feature>  
<name\_type>**GENBANK\_ACCESSION**</name\_type>  
<name\_value>**CAA99203**</name\_value>  
<url><http://www3.ncbi.nlm.nih.gov/htbin-post/Entrez/query?db=p&form=6&uid=CAA99203&Dopt=g></url>  
</refsequence-feature>
- <refsequence-feature>  
<name\_type>**ORF\_TYPE**</name\_type>

```
<name_value>Verified</name_value>
  </refsequence-feature>
- <refsequence-feature>
  <name_type>ORF_STATUS</name_type>
  <name_value>No change</name_value>
  </refsequence-feature>
  </refsequence>
- <refsequence>
  <refsequence-id>4867</refsequence-id>
  <refsequence-species>2</refsequence-species>
  <refsequence-cds-start>1</refsequence-cds-start>
  <refsequence-cds-stop>2286</refsequence-cds-stop>
  <refsequence-chromosome>15</refsequence-chromosome>
  <refsequence-
sequence>ATGGAACACCAAGATAGTTCGCCACCTAGATTCAGGAACTCTGGCTCTAA
TAGAGTCACTGTGTATAACGGTACTACCCTGCCTACGATGCCCAAGAGCGCCACACC
AACATCGAGCTCAACAACAGTTACTACGCATTTGCAAATATTAAGGAGGAGGAAAC
AAACGATGACGAACCTACCCAAGTGGATCGTTCATCTCCTCGTGTGTTTGGGGAGGAT
CTCCTCTACGTCCTCATCTTCATCCAATATTGATTTGCGCGATAACTTGGACATGTTAC
ACGAAATAGAAAAATCAAATACTAATATTTCTTTATCAGCTCCTAATTTGCATGAGGA
ACTGGGCGTTCTCAGCGATAAAGGTAACAGTAAAGAAGAATTGGCTTTGTTACCACC
TTTACCTCACACAGGAGAAATGGAATCACTCCACAATTTGATATCAACGAGGCTAT
TTTTGAACGAGATGACATCAGCCACTCTTCAAGGCTAGAACCAGATGACGTGTTAAC
AAAGTTAGCGAACTCTACTCGAGATGCTACGGGTGAAGATCAGGGGTTTGTGTCAT
GACTCATGGCCACGATGCGTCGACAAACGACGATTGCAATTAAGCGCTACTATTCT
TGACAATCAGACGTCATTTGATCTTTCTAAAGCTCTAGAGATGACTAGCCATTCAAAT
ATTTCTAATATTATTAATAGTTCGGTTCTGAGGGAAGACGTTCAAGGACACCGGTA
AGCAATTCCTACTGAAACCAAATTTATCATCTCCTGAAAGCGCAGAACGTGAAGCA
AACACGACTTCGTCTCCTCTACGTCGGATCACGGGGCAACAATGCAATATGATCCC
AAGAAAATAATAACTCCAATTCCTGTTTTACCTTCCTCTGTCCGTGAACAGCAACAGA
ACAATGCACCTTTGAGAGAAAGAAGCAGATCTAATTCTAGTGCCTGGCATCTACAC
TGAGAGATACGATCATTTCAGGACTGCCTCAAAATATTAATTCTGTAGAAAGAAAGT
TATCAAGGAAGAGTAACAGGAGTAGGAAGAATACGGTGACTTTTGAAGATCGTCTTC
AGAAATTGCCACCCTTAAGCACCCAAATTTGCAACCAGTACGCCAAGGTAGCACCAG
CTGAGAACAATATCGCCTTACACTTTTATAACTTACCTACACCAGTATCAAACACTCA
AACGCCTGTTACGTTTTCAGTCTGAATCCGGACTGACAGGGGGAGAAAAGAAAATGCC
TTTTTTGAGAAGAGCATCTAGTGCCCTATTAAGAAAGACATCTGCCAAAATTTGCTCC
AATTTAACAGAACAAATACACCTACTTTATCGACATCCTCAACATTTGAGTCAGATC
TAAATGCTCGGCAGCCCATGCTAATTCGACGATCTTCCACTATTGATAATAAACTACC
TAGGAGGCAGCTTTCGTGCTCGAAGCTTTATTCGCGCCTCAATTCGGACAGCAAGTT
TGCGAATAGCAGTCGAGCTTCGGAGGAGGTCTTAGTGTCCACTCCAAATGACACAGA
ACACGTCTACAGAAAGACATCTCTAGGTTCTAAGATAAAGAGAGGTTTTACTAGAAT
ATTGAGCGACAGTAATAATAGTAAGGAAATTCCTACTTTATCACCCAAATCTATGGT
GACTACGGGGCCTACAGAATTGTCGTTTTCTCTTTATCAACCGTGGGAGGACATCC
GACAACGCCAGTCTCAAAGAAAATGATCGAGTTTCAATAGATGGCGTGAGTACATT
TAATCGAGCATCAACATCTCTCCAGAATCATCAACAGACGACATCTCTCCACTACGC
GAAGAAGGTAAGATTAATGTTCTAAAAGAACGTCAAGTAGAAAGATACTGTCTAAA
AATTCGAAGCAAAAAAATGTAAGTGCCTGAACAGCAAACAAAGCCAAGTGAAATATAT
CTGGATAAAGAAGCCTTACAAAGTTTTGTTCCCGTACTCTCTGTCCACAGAGGGTACTC
ATCGCATCAATCGCTCGTTCGTTACAAACGCAATCTACCATCGGATTATGCATTACCAA
TTTAAGAAACAAAGAAGGCATGAAGCTCAATGCCAAGGAATACGTGGAAATCCTGG
CTCAGCAGCAACGCAAGGAAGATGAAAGGTATGCTGTTTTGGAAAGAAAATTTGCAT
```

CTTGTAGATGGTGCAGTGATAAGGACCTGCAGTATTTGAAAAAGAAACGAATTTCCA  
TGAATAAGATATGGTCTGATTATGTCCGATTTTACCGTGGAAAGTTGAACAACCCAT  
GA</refsequence-sequence>

- <refsequence-feature>  
<name\_type>GENBANK\_ACCESSION</name\_type>  
<name\_value>CAA99038</name\_value>  
<url><http://www3.ncbi.nlm.nih.gov/htbin-post/Entrez/query?db=p&form=6&uid=CAA99038&Dopt=g></url>  
</refsequence-feature>

- <refsequence-feature>  
<name\_type>SGD</name\_type>  
<name\_value>YOL036W</name\_value>  
<url><http://genome-www.stanford.edu/cgi-bin/dbrun/SacchDB?find+Sequence+%22YOL036W%22></url>  
</refsequence-feature>

- <refsequence-feature>  
<name\_type>GI</name\_type>  
<name\_value>1419830</name\_value>  
</refsequence-feature>

- <refsequence-feature>  
<name\_type>ORF\_STATUS</name\_type>  
<name\_value>No change</name\_value>  
</refsequence-feature>

- <refsequence-feature>  
<name\_type>ORF\_TYPE</name\_type>  
<name\_value>Uncharacterized</name\_value>  
</refsequence-feature>  
</refsequence>

- <refsequence>  
<refsequence-id>858</refsequence-id>  
<refsequence-species>2</refsequence-species>  
<refsequence-cds-start>1</refsequence-cds-start>  
<refsequence-cds-stop>2286</refsequence-cds-stop>  
<refsequence-chromosome>15</refsequence-chromosome>  
</refsequence->

sequence>ATGAATTTTTCCAGCATTTCAAATCTATTTCGAATTTCCAGTTCCCATAC  
ACCATAGAGGAAACTGCAATCACTGAAACCGCCCTTTGGCAATGTTTCGATGGTACA  
AGGAAGGCAGATTCCTTGCCAGTAACAGTTTTTAAGGCAAAAAGATCTCCAGAAAAT  
GAATCTTTAATTTAAATGCTGTACACAAGAGCAAAATTTGAAGATTCCAGGACTTT  
GTACGGTGCTGGAGACATTTGATTCCGACCCCAATCCACATTTATTGTTACCGAACG  
AGTAGTCCATTTCTTGGGATAATCTAGGCTCTTTATCTCAAACAAATTTGGTGT  
GAATTAGGAATATACAATTATTGGCAACTTTAGGATTTTTAAAAAATTTGTCCTTG  
GTACGCTTTCTAAAGATTCTGTTTTTATCAATATTAAGGGAGAGTGGGTAATTTGG  
GCTAGAATTTGTTCAAGCAAAGAAGGATTAAGTGCCTTTGAATTTGCCAGTAGAGC  
GAGGTCATATTACAACATAATTGGCTCACAGTTGCCCTGTGAAGATCCGAATACAAT  
TGATTCAATGGGGTTAGGATTGTTGATAAAGAGCCTTATGGCTCCTTCTTGTCTGCC  
AAAGATTGGATTGTCAATGTAAATATGATTTTCAGATGGAAAGATAACAATCGAAAAC  
TTCAGAAAAGGCTAGAAAATACAGAACTTTGGCGTTCTAATCCTTTGATAAACTTTT  
ATCAAGAATTGAGGGAGTTGCATATAAAGGACCCACAGGGAAAATTGGTTGTGATGT  
CAAATTTGGAAAATTTGTATTTAGAGTCAAGAGAGATTTTCCGTAATTTAACGCCTG  
GAATGATAGAAAATTTTATTATTCCAGAGCTTTGTGAAATTATAAAATTATTAATGAC

ACAAAGCATCAGTAGTGCTGCCAGCCCTATAGGCATGAACTTCAACGCATCACATAA  
ACTAGTACCATTCTTAGCGATTGTTTTAGACCTAACTTCTGAAACGAACACCTTTCCA  
GTTGGTTTTCAACGACCTTATCACCCAAAGTTTTAAACTGCCAGATAGGCAAGTAAGA  
TTTTCTTTTACTAATATACCTACCCAAATTAATAGGTCCATTGAGCAAATCAGAGATCT  
CCAGTAGGATATATCCACATTTTATCCAAGGTCTGACCGACTCTGATGCCACTCTTAG  
ATTACAAACACTGAAGACAATTCCATGCATTGTGTCATGTTTAAACAGAGAGACAACT  
GAATAATGAGCTACTGAGGTTTCTCGCAAAAACACAGGTTGATTCTGACGTTGAAAT  
CCGAACATGGACAGTCATCATAATAAGTAAAATCTCAACCATATTATCAACGTCAGTT  
GGTAATCGCTCGAATATTTTAGCTACGGCGTTCACAAAATCTTTGAAAGATCCTCAAG  
TAAAACCAAGATTGGCTGCTCTTTATGGGCTTGAGAAGTCGATTGAGCTGTTTGATG  
TGAACACAATCGCCAACAAAATTTTAAACAGTCATTGCCCTGGTTTATTAGATAAAAAG  
TCCCATAGTAAGAGGCAGAGCCAAAATCCTGTTCAAGAATATCTGGAAAAATTGGA  
AAAAGAAGCCCAACTTATTCAAACAAAACGATAGTACTGCAGATTCGGAAGATGTGAA  
AGATATTGATTTTGAAGAATTACGGTTGTGATGAAGAGGATATGAATAAAGAAGACAA  
TTTGTTAGCCGCACAATTTTAAATAATTTACGTTTAAATTCTCCCTCAGCAACAACA  
CCAAGTAACATTACCGAGAGCGAAATTGATTCCGCCAGGATGGAAGTGGATGGGA  
CGACCTCAGCGATACCGATGGCTTTATTACAAATGGTACCACAGAATCCTTCGATGA  
AACAAACAAACCCTGTAACAACCGCAAGCACCCCAAAATTATTCGAAAACCTATTAA  
AATTAATAAAAGTTGGAATGATGAGTTGAATGATGATGGCTGGATTCAAGATGAAAG  
CGGCCATCAAAGTGCCTCAAAAACACACAAGGCCACAAAATTCAACGTTGGCAAA  
ATCCATCGCTCCTAGCTCAAGGCTTTCTATCAAGAAGAAGAAAACAACGATCCTAGC  
ACCAAGAACATTGCTAGTAACTCTACTGTTACCACAAATCGTCACTGTCCAATAAA  
ACTGCAAGAAGTAAGCCTATAAGTAGTATCCGCGGCTCGGTAACCAAGAAAGGAAA  
TGTTGACGGCTGGGATGATGATGGGGATTGAGACTCCTGGGATACGAATTGGTGA</

refsequence-sequence>

- <refsequence-feature>

<name\_type>**SGD**</name\_type>

<name\_value>**YOR112W**</name\_value>

<url><http://genome-www.stanford.edu/cgi-bin/dbrun/SacchDB?find+Sequence+%22YOR112W%22></url>

</refsequence-feature>

- <refsequence-feature>

<name\_type>**GI**</name\_type>

<name\_value>**1420301**</name\_value>

</refsequence-feature>

- <refsequence-feature>

<name\_type>**GENBANK\_ACCESSION**</name\_type>

<name\_value>**CAA99310**</name\_value>

<url><http://www3.ncbi.nlm.nih.gov/htbin-post/Entrez/query?db=p&form=6&uid=CAA99310&Dopt=g></url>

</refsequence-feature>

- <refsequence-feature>

<name\_type>**ORF\_TYPE**</name\_type>

<name\_value>**Uncharacterized**</name\_value>

</refsequence-feature>

- <refsequence-feature>

<name\_type>**ORF\_STATUS**</name\_type>

<name\_value>**No change**</name\_value>

</refsequence-feature>

</refsequence>

- <refsequence>

<refsequence-id>4610</refsequence-id>  
<refsequence-species>2</refsequence-species>  
<refsequence-cds-start>1</refsequence-cds-start>  
<refsequence-cds-stop>2304</refsequence-cds-stop>  
<refsequence-chromosome>14</refsequence-chromosome>  
<refsequence-

sequence>ATGGCAAAAAGGCATAGTCATTATCAAGGAAGCAGACGTAGGCATGCAC  
GTGGTAGCAATTCCAAGAAAGCTGGCAGGGGGAATGCTAAAGGCATACAAGGCAGA  
AAGATAAAGAAAAACCTACTCCCACTAACAGTTGGCATAACTCTTCTATACCACTA  
GGAGAAGGTGATCTTGATGATGTAGGCGCCGACTTCAACCCAGGAAGAGCATTCCATA  
TCACCAAAAACCTATAGAAGACTATTATTTTGGTCGCGATGCCAAGAGCCGTTCTATG  
AAAATGGGTGGTTTAAGACCAGGTAATCGATATGATTCTTCAACTGACCTACAAGCA  
GGAAGGGCAGCATTCCGCAAAAAGACCTATGCAATTTGTA AAAAGCTAAGGAAGTTTAC  
GATCCATCCCAATATGATTCAAAAACCTGAGAGCAAAGAACGAAACAAAGAACAGT  
GAAGAAATTGTGCAAAGGGGAAGCAGACGTTTTTGAAGAACCAGGAAAGATGACTTC  
TGATGTTGAATATATTAACAATGAAGACAGTGAAAACGAGGATGATGATAGTCAGA  
ATCACCCCTCGACGGACCACTCGCTGTCTTCGAATGAAAGCAAAGTTGAAGATGGTG  
ACCTGTTTTTTGTAGATGAAGAGGCTCAGCAATCGCCGGATCTAACCAAAAATAAAA  
GAGTATGTATCGAGGAAATCGCAAGGCCAAGAGAAGTTGCGATAGAGTTCGATCCT  
ATCTTAACAATTGGAAAGGTTGAACTTAGCGTTTCCGAAGGTAACGAAAGCAAGGAA  
ATTAGTGTGACGTTCCAAATAAGGGTAATAAGACATATCATCCATTTGCTGGTTACA  
TTTCCAACGTATTACATGGTATGCATACTAGCGACTCGGACAATGATGAACTAGACT  
ACGAAATAGAAACAGAGAATAATAGTGAACCTTTATACGAATCCTCAGCAAGTTCTG  
AGTTGATCAAGGGTTTAATTATGTTGGCCAACGTCACAATCCCGAGCTGACAACA  
ATCTTTTACCAAGCCCTAGTCCGCAGTTGACAGAAGATATAAAATGTCTTTCAATAAA  
TGGTACCAAAACATTCGAAGGCAATAATGATAATCTGCCATCTCCTGCTAGCGAAGA  
GTTAGAATTTGGATTCAAAGAAGAAGATTTTGCATAAATACTAATGACATAGTGGT  
CTCCAATATAAGAATGGGCGGAGTAGACAATTCATATTATCTACGGTGTTACAGATT  
ACTGGGAGATTACGACTTTCATTGGATTGACCAGGACTTACTCACAGACTTCGTTGTA  
GACGAGTTAGGTCTTCTGAAGATAGATTACCTGCATATTTGAATTTTATTA AAAAATT  
CTCTTATACCAAAAATTGAACCAGCTGAGCCAACCTACTCAGATATTCCGATTTCTGA  
TTCGAGTGATGAAGGTGACAGCTATGAAGGCGACAGCTATGAAGATGATGAAGATA  
TGGCCTCCTCGGTTGTGCATAGCGACATTGAAGAGGGTCTGGACGACCTAATTGCAT  
ACACATTGAAACATGATACAGAAAGATTCAAACATTTGAAACCAAGTCCTTGGAAA  
CTAAGGGTAAAGGTAAGAAGAAGAAGCTACTCATCGATGACGCCTTAGCGCTGGAT  
ACAGAAACGTTGGAGACGTTACAAAGTAAGTTTGTAAACGCATAGAAACCAAAAGC  
AAAGAAAAGAAAAGCCAAAGAAGATTTTATTGATCAGGAGAATAGAAATTCGAACG  
ATATGCTCAAGAAATACCCATATGGACTCCATATTCAAATATTAAGATGAATTTGA  
GTCCTTTTTGTCTAGGAACAATGATAGACTGACTTTCCTCCATTAGATCCTCATGGA  
AACAAAGACCGTAATGAAAATTGCGAAGCATTATAATATGAAGAGTTCAAAAATTGGG  
AAAGCAAATCATACTCGGTTGTTGTAGAAAAAATAAAGAAAACGAAATGGTCTTCT  
CCGAATTATAGTCTCATTGACCAATTGATGAGGCAGAGGCCAGTATTCATGAGAATA  
GATATAAGAAGACCGAGGGAGGAACAAGCTGCTTTCGAAAGA ACTAAAACAATCAG  
AGGGAAATTTTATGTTAAAGAAGGTGAGATTGTTGGTCAAACGCTCCAGAGATTGG  
AAACGAAAATATCGGTAGAAGAATGTTGGAAAAGCTTGGGTGGAAAAGTGGAGAGG  
GCCTTGGTATTCAAGGCAATAAAGGTATAAGTGAACCAATTTTTGCCAAAATTA AAA  
AGAATAGATCGGGTTTAAGACACAGTGAAAAGTTAA</refsequence-sequence>

- <refsequence-feature>

<name\_type>GENBANK\_ACCESSION</name\_type>

<name\_value>CAA96127</name\_value>

<url><http://www3.ncbi.nlm.nih.gov/htbin->

[post/Entrez/query?db=p&form=6&uid=CAA96127&Dopt=g](http://www3.ncbi.nlm.nih.gov/htbin-post/Entrez/query?db=p&form=6&uid=CAA96127&Dopt=g)</url>



```
    </refsequence-feature>
- <refsequence-feature>
  <name_type>SGD</name_type>
  <name_value>YNL224C</name_value>
  <url>http://genome-www.stanford.edu/cgi-
    bin/dbrun/SacchDB?find+Sequence+%22YNL224C%22</url>
  </refsequence-feature>
- <refsequence-feature>
  <name_type>GI</name_type>
  <name_value>1302245</name_value>
  </refsequence-feature>
- <refsequence-feature>
  <name_type>ORF_STATUS</name_type>
  <name_value>No change</name_value>
  </refsequence-feature>
- <refsequence-feature>
  <name_type>ORF_TYPE</name_type>
  <name_value>Uncharacterized</name_value>
  </refsequence-feature>
  </refsequence>
</sequence-info>
```
